# Supplementary material for: Molecular interactions in diffusion-controlled aldol condensation with mesoporous silica nanoparticles
Source: Royal Society of Chemistry journal article supplement (doi:10.1039/d2cp00952h), 2022-01-01
Supplement: d2cp00952h1.pdf [file d2cp00952h1.pdf]

## SUPPORTING INFORMATION for

### Molecular interactions in diffusion-controlled aldol condensation with mesoporous silica nanoparticles

Yu Lim Kim,<sup>1,2</sup> James W. Evans<sup>1,3</sup> and Mark S. Gordon<sup>1,2\*</sup>

<sup>1</sup>Ames Laboratory – US Department of Energy, Iowa State University, Ames, Iowa 50011

<sup>2</sup>Department of Chemistry, Iowa State University, Ames, Iowa 50010

<sup>3</sup>Department of Physics & Astronomy, Iowa State University, Ames, Iowa 50010

**TABLE S1.** Cartesian coordinates at equilibrium points for acetone dimer in four different configurations.

| Acetone dimer in <i>trans</i> -sandwich configuration |               |                           |                           |                           |
|-------------------------------------------------------|---------------|---------------------------|---------------------------|---------------------------|
| Atomic type                                           | Atomic number | Coordinates x (Angstroms) | Coordinates y (Angstroms) | Coordinates z (Angstroms) |
| C                                                     | 6             | -0.0115662                | 0.11488955                | -0.0037582                |
| O                                                     | 8             | -0.0054936                | 1.3457191                 | 0.01703516                |
| C                                                     | 6             | -1.3014216                | -0.6723754                | -0.0343055                |
| C                                                     | 6             | 1.27066004                | -0.685491                 | -0.0004346                |
| H                                                     | 1             | 2.12014818                | -0.0177386                | 0.2161532                 |
| H                                                     | 1             | 1.21336973                | -1.5037359                | 0.74794924                |
| H                                                     | 1             | 1.40555763                | -1.1551127                | -0.9989194                |
| H                                                     | 1             | -2.1444435                | 0.01087671                | -0.2258338                |
| H                                                     | 1             | -1.4399505                | -1.1765671                | 0.94644451                |
| H                                                     | 1             | -1.2524308                | -1.4635377                | -0.8117157                |
| C                                                     | 6             | -0.0071673                | -0.0513192                | 3.21364689                |
| O                                                     | 8             | 0.01652749                | -1.2819822                | 3.1958189                 |
| C                                                     | 6             | 1.25380027                | 0.76930952                | 3.0688169                 |
| C                                                     | 6             | -1.2989453                | 0.71548927                | 3.38109517                |
| H                                                     | 1             | -2.1046822                | 0.02014104                | 3.6669488                 |
| H                                                     | 1             | -1.1787716                | 1.51273727                | 4.14453411                |
| H                                                     | 1             | -1.5522186                | 1.21044731                | 2.41850328                |
| H                                                     | 1             | 2.08598685                | 0.11377595                | 2.76559496                |
| H                                                     | 1             | 1.48702097                | 1.24804044                | 4.04436541                |
| H                                                     | 1             | 1.10280049                | 1.58131373                | 2.32682467                |
| Acetone dimer in linear configuration                 |               |                           |                           |                           |

| Atomic type | Atomic number | Coordinates x (Angstroms) | Coordinates y (Angstroms) | Coordinates z (Angstroms) |
|-------------|---------------|---------------------------|---------------------------|---------------------------|
| C           | 6             | -0.0115662                | 0.11488955                | -0.0037582                |
| O           | 8             | -0.0054936                | 1.3457191                 | 0.01703516                |
| C           | 6             | -1.3014216                | -0.6723754                | -0.0343055                |
| C           | 6             | 1.27066004                | -0.685491                 | -0.0004346                |
| H           | 1             | 2.12014818                | -0.0177386                | 0.2161532                 |
| H           | 1             | 1.21336973                | -1.5037359                | 0.74794924                |
| H           | 1             | 1.40555763                | -1.1551127                | -0.9989194                |
| H           | 1             | -2.1444435                | 0.01087671                | -0.2258338                |
| H           | 1             | -1.4399505                | -1.1765671                | 0.94644451                |
| H           | 1             | -1.2524308                | -1.4635377                | -0.8117157                |
| C           | 6             | -0.0115662                | -4.8851104                | -0.0037582                |
| O           | 8             | -0.0054936                | -3.6542809                | 0.01703516                |
| C           | 6             | -1.3014216                | -5.6723757                | -0.0343055                |
| C           | 6             | 1.27066004                | -5.6854911                | -0.0004346                |
| H           | 1             | 2.12014818                | -5.0177388                | 0.2161532                 |
| H           | 1             | 1.21336973                | -6.5037355                | 0.74794924                |
| H           | 1             | 1.40555763                | -6.1551127                | -0.9989194                |
| H           | 1             | -2.1444435                | -4.9891233                | -0.2258338                |
| H           | 1             | -1.4399505                | -6.1765671                | 0.94644451                |
| H           | 1             | -1.2524308                | -6.4635377                | -0.8117157                |

**Acetone dimer in T-shaped configuration**

| Atomic type | Atomic number | Coordinates x (Angstroms) | Coordinates y (Angstroms) | Coordinates z (Angstroms) |
|-------------|---------------|---------------------------|---------------------------|---------------------------|
| C           | 6             | -0.0115662                | 0.11488955                | -0.0037582                |
| O           | 8             | -0.0054936                | 1.3457191                 | 0.01703516                |
| C           | 6             | -1.3014216                | -0.6723754                | -0.0343055                |
| C           | 6             | 1.27066004                | -0.685491                 | -0.0004346                |
| H           | 1             | 2.12014818                | -0.0177386                | 0.2161532                 |
| H           | 1             | 1.21336973                | -1.5037359                | 0.74794924                |
| H           | 1             | 1.40555763                | -1.1551127                | -0.9989194                |
| H           | 1             | -2.1444435                | 0.01087671                | -0.2258338                |
| H           | 1             | -1.4399505                | -1.1765671                | 0.94644451                |
| H           | 1             | -1.2524308                | -1.4635377                | -0.8117157                |
| C           | 6             | 0.01575449                | 0.02191617                | 4.15645266                |
| O           | 8             | 0.02232694                | -0.0181758                | 2.92610312                |
| C           | 6             | -1.2699583                | 0.15591508                | 4.93967295                |
| C           | 6             | 1.29315305                | -0.0607883                | 4.96027899                |

| H                                                        | 1             | 2.15891576                | 0.0389601                 | 4.28578806                |
|----------------------------------------------------------|---------------|---------------------------|---------------------------|---------------------------|
| H                                                        | 1             | 1.31021333                | 0.72871464                | 5.7408433                 |
| H                                                        | 1             | 1.33047795                | -1.043515                 | 5.47851515                |
| H                                                        | 1             | -2.1284864                | 0.01440243                | 4.26357651                |
| H                                                        | 1             | -1.3114407                | 1.16897178                | 5.39493704                |
| H                                                        | 1             | -1.2961494                | -0.5829559                | 5.76797724                |
| <b>Acetone dimer in parallel-displaced configuration</b> |               |                           |                           |                           |
| Atomic type                                              | Atomic number | Coordinates x (Angstroms) | Coordinates y (Angstroms) | Coordinates z (Angstroms) |
| C                                                        | 6             | -0.0115662                | 0.11488955                | -0.0037582                |
| O                                                        | 8             | -0.0054936                | 1.3457191                 | 0.01703516                |
| C                                                        | 6             | -1.3014216                | -0.6723754                | -0.0343055                |
| C                                                        | 6             | 1.27066004                | -0.685491                 | -0.0004346                |
| H                                                        | 1             | 2.12014818                | -0.0177386                | 0.2161532                 |
| H                                                        | 1             | 1.21336973                | -1.5037359                | 0.74794924                |
| H                                                        | 1             | 1.40555763                | -1.1551127                | -0.9989194                |
| H                                                        | 1             | -2.1444435                | 0.01087671                | -0.2258338                |
| H                                                        | 1             | -1.4399505                | -1.1765671                | 0.94644451                |
| H                                                        | 1             | -1.2524308                | -1.4635377                | -0.8117157                |
| C                                                        | 6             | -0.0071673                | 0.34868082                | 3.21364689                |
| O                                                        | 8             | 0.01652749                | -0.8819822                | 3.1958189                 |
| C                                                        | 6             | 1.25380027                | 1.1693095                 | 3.0688169                 |
| C                                                        | 6             | -1.2989453                | 1.11548924                | 3.38109517                |
| H                                                        | 1             | -2.1046822                | 0.42014104                | 3.6669488                 |
| H                                                        | 1             | -1.1787716                | 1.91273725                | 4.14453411                |
| H                                                        | 1             | -1.5522186                | 1.61044741                | 2.41850328                |
| H                                                        | 1             | 2.08598685                | 0.51377594                | 2.76559496                |
| H                                                        | 1             | 1.48702097                | 1.64804041                | 4.04436541                |
| H                                                        | 1             | 1.10280049                | 1.98131371                | 2.32682467                |

**TABLE S2.** Cartesian coordinates at equilibrium points for hexane dimer in three different configurations. (a) *trans*-Sandwich (b) T-shaped (c) Cross

| <b>Hexane dimer in <i>trans</i>-sandwich configuration</b> |               |                           |                           |                           |
|------------------------------------------------------------|---------------|---------------------------|---------------------------|---------------------------|
| Atomic type                                                | Atomic number | Coordinates x (Angstroms) | Coordinates y (Angstroms) | Coordinates z (Angstroms) |
| C                                                          | 6             | -3.1916871                | 0.220534                  | -0.000079                 |

|   |   |            |            |            |
|---|---|------------|------------|------------|
| C | 6 | 3.191679   | -0.22064   | -0.000109  |
| C | 6 | -0.6624965 | 0.37542349 | 0.000084   |
| C | 6 | 0.66248655 | -0.3755329 | 0.0001387  |
| C | 6 | 1.87529767 | 0.54650563 | 0.00002184 |
| C | 6 | -1.8753073 | -0.5466147 | -0.0000397 |
| H | 1 | 4.0495882  | 0.45090935 | -0.0003181 |
| H | 1 | -4.0495982 | -0.4510131 | -0.0001514 |
| H | 1 | -3.267195  | 0.85966712 | -0.8804229 |
| H | 1 | -3.2673273 | 0.8595553  | 0.8803367  |
| H | 1 | 3.26739216 | -0.8596207 | 0.88033277 |
| H | 1 | 3.26711679 | -0.8598127 | -0.8804275 |
| H | 1 | -1.8284242 | -1.1999787 | 0.87536758 |
| H | 1 | -1.8283005 | -1.1998738 | -0.8755182 |
| H | 1 | 1.82844031 | 1.19982517 | 0.87546831 |
| H | 1 | 1.8282634  | 1.19980919 | -0.8754175 |
| H | 1 | -0.7073762 | 1.03037131 | -0.8763072 |
| H | 1 | -0.7075243 | 1.0303061  | 0.87652022 |
| H | 1 | 0.70745343 | -1.0303799 | 0.87660414 |
| H | 1 | 0.70742667 | -1.0305164 | -0.8762234 |
| C | 6 | -3.1916871 | 0.220534   | 4.09992123 |
| C | 6 | 3.191679   | -0.22064   | 4.09989119 |
| C | 6 | -0.6624965 | 0.37542349 | 4.1000843  |
| C | 6 | 0.66248655 | -0.3755329 | 4.10013866 |
| C | 6 | 1.87529767 | 0.54650563 | 4.10002184 |
| C | 6 | -1.8753073 | -0.5466147 | 4.09996033 |
| H | 1 | 4.0495882  | 0.45090935 | 4.09968185 |
| H | 1 | -4.0495982 | -0.4510131 | 4.09984875 |
| H | 1 | -3.267195  | 0.85966712 | 3.21957707 |
| H | 1 | -3.2673273 | 0.8595553  | 4.98033667 |
| H | 1 | 3.26739216 | -0.8596207 | 4.98033237 |
| H | 1 | 3.26711679 | -0.8598127 | 3.21957254 |
| H | 1 | -1.8284242 | -1.1999787 | 4.97536755 |
| H | 1 | -1.8283005 | -1.1998738 | 3.22448182 |
| H | 1 | 1.82844031 | 1.19982517 | 4.97546816 |
| H | 1 | 1.8282634  | 1.19980919 | 3.22458243 |
| H | 1 | -0.7073762 | 1.03037131 | 3.22369289 |
| H | 1 | -0.7075243 | 1.0303061  | 4.97652006 |
| H | 1 | 0.70745343 | -1.0303799 | 4.97660398 |
| H | 1 | 0.70742667 | -1.0305164 | 3.22377658 |

---

**Hexane dimer in T-shaped configuration**

| Atomic type | Atomic number | Coordinates x (Angstroms) | Coordinates y (Angstroms) | Coordinates z (Angstroms) |
|-------------|---------------|---------------------------|---------------------------|---------------------------|
| C           | 6             | -3.1916871                | 0.220534                  | -0.000079                 |
| C           | 6             | 3.191679                  | -0.22064                  | -0.000109                 |
| C           | 6             | -0.6624965                | 0.37542349                | 0.000084                  |
| C           | 6             | 0.66248655                | -0.3755329                | 0.0001387                 |
| C           | 6             | 1.87529767                | 0.54650563                | 0.00002184                |
| C           | 6             | -1.8753073                | -0.5466147                | -0.0000397                |
| H           | 1             | 4.0495882                 | 0.45090935                | -0.0003181                |
| H           | 1             | -4.0495982                | -0.4510131                | -0.0001514                |
| H           | 1             | -3.267195                 | 0.85966712                | -0.8804229                |
| H           | 1             | -3.2673273                | 0.8595553                 | 0.8803367                 |
| H           | 1             | 3.26739216                | -0.8596207                | 0.88033277                |
| H           | 1             | 3.26711679                | -0.8598127                | -0.8804275                |
| H           | 1             | -1.8284242                | -1.1999787                | 0.87536758                |
| H           | 1             | -1.8283005                | -1.1998738                | -0.8755182                |
| H           | 1             | 1.82844031                | 1.19982517                | 0.87546831                |
| H           | 1             | 1.8282634                 | 1.19980919                | -0.8754175                |
| H           | 1             | -0.7073762                | 1.03037131                | -0.8763072                |
| H           | 1             | -0.7075243                | 1.0303061                 | 0.87652022                |
| H           | 1             | 0.70745343                | -1.0303799                | 0.87660414                |
| H           | 1             | 0.70742667                | -1.0305164                | -0.8762234                |
| C           | 6             | 0.39806202                | -0.015773                 | 10.1685467                |
| C           | 6             | -0.4034346                | 0.00096062                | 3.82037139                |
| C           | 6             | 0.40959141                | -0.0024344                | 7.63467836                |
| C           | 6             | -0.4149588                | -0.0127887                | 6.35423899                |
| C           | 6             | 0.4367927                 | 0.0115024                 | 5.09130764                |
| C           | 6             | -0.4421647                | -0.026485                 | 8.89761066                |
| H           | 1             | 0.21835804                | 0.01867334                | 2.9259181                 |
| H           | 1             | -0.223734                 | -0.0332043                | 11.0630026                |
| H           | 1             | 1.0221585                 | 0.87740922                | 10.2124443                |
| H           | 1             | 1.05835319                | -0.8829549                | 10.2033672                |
| H           | 1             | -1.0273886                | -0.8923154                | 3.77625966                |
| H           | 1             | -1.0638634                | 0.8680414                 | 3.78576016                |
| H           | 1             | -1.0789487                | -0.915145                 | 8.88312149                |
| H           | 1             | -1.1149463                | 0.83534735                | 8.89215469                |
| H           | 1             | 1.10962558                | -0.850296                 | 5.0966115                 |
| H           | 1             | 1.07352424                | 0.90019268                | 5.10595226                |

|   |   |            |            |            |
|---|---|------------|------------|------------|
| H | 1 | 1.04782271 | 0.88725054 | 7.64708424 |
| H | 1 | 1.08390129 | -0.8651823 | 7.638062   |
| H | 1 | -1.0530928 | -0.9025455 | 6.34174061 |
| H | 1 | -1.0893629 | 0.84988266 | 6.35094881 |

### Hexane dimer in cross configuration

| Atomic type | Atomic number | Coordinates x (Angstroms) | Coordinates y (Angstroms) | Coordinates z (Angstroms) |
|-------------|---------------|---------------------------|---------------------------|---------------------------|
| C           | 6             | -3.1916871                | 0.220534                  | -0.000079                 |
| C           | 6             | 3.191679                  | -0.22064                  | -0.000109                 |
| C           | 6             | -0.6624965                | 0.37542349                | 0.000084                  |
| C           | 6             | 0.66248655                | -0.3755329                | 0.0001387                 |
| C           | 6             | 1.87529767                | 0.54650563                | 0.00002184                |
| C           | 6             | -1.8753073                | -0.5466147                | -0.0000397                |
| H           | 1             | 4.0495882                 | 0.45090935                | -0.0003181                |
| H           | 1             | -4.0495982                | -0.4510131                | -0.0001514                |
| H           | 1             | -3.267195                 | 0.85966712                | -0.8804229                |
| H           | 1             | -3.2673273                | 0.8595553                 | 0.8803367                 |
| H           | 1             | 3.26739216                | -0.8596207                | 0.88033277                |
| H           | 1             | 3.26711679                | -0.8598127                | -0.8804275                |
| H           | 1             | -1.8284242                | -1.1999787                | 0.87536758                |
| H           | 1             | -1.8283005                | -1.1998738                | -0.8755182                |
| H           | 1             | 1.82844031                | 1.19982517                | 0.87546831                |
| H           | 1             | 1.8282634                 | 1.19980919                | -0.8754175                |
| H           | 1             | -0.7073762                | 1.03037131                | -0.8763072                |
| H           | 1             | -0.7075243                | 1.0303061                 | 0.87652022                |
| H           | 1             | 0.70745343                | -1.0303799                | 0.87660414                |
| H           | 1             | 0.70742667                | -1.0305164                | -0.8762234                |
| C           | 6             | 0.17479113                | 3.19362903                | 3.97275496                |
| C           | 6             | -0.1747974                | -3.1937459                | 3.82705784                |
| C           | 6             | 0.36588714                | 0.66745222                | 3.92071056                |
| C           | 6             | -0.3659037                | -0.6675761                | 3.87951279                |
| C           | 6             | 0.57329899                | -1.8670943                | 3.86852479                |
| C           | 6             | -0.5733112                | 1.86697519                | 3.93145776                |
| H           | 1             | 0.50889081                | -4.0419793                | 3.81948185                |
| H           | 1             | -0.5088903                | 4.04187059                | 3.98004985                |
| H           | 1             | 0.82712716                | 3.29731941                | 3.10505462                |
| H           | 1             | 0.7981391                 | 3.25889015                | 4.86515617                |
| H           | 1             | -0.8269798                | -3.2976413                | 4.69485378                |
| H           | 1             | -0.7983012                | -3.2588093                | 2.9347558                 |

|   |   |            |            |            |
|---|---|------------|------------|------------|
| H | 1 | -1.2402041 | 1.79180932 | 4.79460621 |
| H | 1 | -1.2113848 | 1.83003044 | 3.04437447 |
| H | 1 | 1.21143591 | -1.8302974 | 4.75557375 |
| H | 1 | 1.24012971 | -1.7917774 | 3.00534725 |
| H | 1 | 1.03440821 | 0.74065912 | 3.05656195 |
| H | 1 | 1.00559664 | 0.70242029 | 4.80873537 |
| H | 1 | -1.0343238 | -0.7408704 | 4.74373531 |
| H | 1 | -1.0057163 | -0.7024596 | 2.99156237 |

**TABLE S3.** Cartesian coordinates at equilibrium points for p-nitrobenzaldehyde (PNB) dimer in four different configurations.

| <b>PNB dimer in <i>trans</i>-sandwich configuration</b> |               |                           |                           |                           |
|---------------------------------------------------------|---------------|---------------------------|---------------------------|---------------------------|
| Atomic type                                             | Atomic number | Coordinates x (Angstroms) | Coordinates y (Angstroms) | Coordinates z (Angstroms) |
| C                                                       | 6             | -0.033602                 | 1.64410698                | -0.01630000               |
| C                                                       | 6             | -1.23173916               | 0.92596388                | 0.04582101                |
| C                                                       | 6             | -1.21003163               | -0.46084723               | 0.07117305                |
| C                                                       | 6             | 0.02478168                | -1.10254896               | 0.03500383                |
| C                                                       | 6             | 1.23131478                | -0.41665328               | -0.02260136               |
| C                                                       | 6             | 1.19007099                | 0.97239947                | -0.04906487               |
| H                                                       | 1             | -2.16701913               | 1.47059393                | 0.07150730                |
| H                                                       | 1             | -2.11564064               | -1.04795659               | 0.11637816                |
| H                                                       | 1             | 2.1607852                 | -0.96627808               | -0.04689876               |
| H                                                       | 1             | 2.11246991                | 1.54006934                | -0.09635325               |
| N                                                       | 7             | 0.05430805                | -2.57314062               | 0.05567755                |
| O                                                       | 8             | -1.02379966               | -3.16082001               | 0.08791073                |
| O                                                       | 8             | 1.15500903                | -3.11810827               | 0.03817252                |
| C                                                       | 6             | -0.05168004               | 3.12475657                | -0.05133451               |
| O                                                       | 8             | -1.06583869               | 3.79219365                | -0.02035229               |
| H                                                       | 1             | 0.94321316                | 3.60415411                | -0.11097953               |
| C                                                       | 6             | -0.08400372               | -1.74724817               | 3.61289287                |
| C                                                       | 6             | 1.13600528                | -1.06409490               | 3.61390758                |
| C                                                       | 6             | 1.15560675                | 0.32296574                | 3.62002373                |
| C                                                       | 6             | -0.06050561               | 1.00037181                | 3.62674785                |
| C                                                       | 6             | -1.28777194               | 0.34975731                | 3.63013101                |
| C                                                       | 6             | -1.28797555               | -1.04013646               | 3.62211204                |
| H                                                       | 1             | 2.05534935                | -1.63576031               | 3.60795712                |

|   |   |             |             |            |
|---|---|-------------|-------------|------------|
| H | 1 | 2.07895708  | 0.88358158  | 3.61840034 |
| H | 1 | -2.20111036 | 0.92626137  | 3.63715076 |
| H | 1 | -2.22761869 | -1.58085406 | 3.62208104 |
| N | 7 | -0.04648366 | 2.47133827  | 3.62730432 |
| O | 8 | 1.048599    | 3.02724957  | 3.60542607 |
| O | 8 | -1.13066995 | 3.04834223  | 3.64841199 |
| C | 6 | -0.1103629  | -3.22811937 | 3.59861946 |
| O | 8 | 0.88442117  | -3.92478967 | 3.59640956 |
| H | 1 | -1.12037241 | -3.67863059 | 3.58802605 |

**PNB dimer in *cis*-sandwich configuration**

| Atomic type | Atomic number | Coordinates x (Angstroms) | Coordinates y (Angstroms) | Coordinates z (Angstroms) |
|-------------|---------------|---------------------------|---------------------------|---------------------------|
| C           | 6             | -0.033602                 | 1.64410698                | -0.01630000               |
| C           | 6             | -1.23173916               | 0.92596388                | 0.04582101                |
| C           | 6             | -1.21003163               | -0.46084723               | 0.07117305                |
| C           | 6             | 0.02478168                | -1.10254896               | 0.03500383                |
| C           | 6             | 1.23131478                | -0.41665328               | -0.02260136               |
| C           | 6             | 1.19007099                | 0.97239947                | -0.04906487               |
| H           | 1             | -2.16701913               | 1.47059393                | 0.07150730                |
| H           | 1             | -2.11564064               | -1.04795659               | 0.11637816                |
| H           | 1             | 2.1607852                 | -0.96627808               | -0.04689876               |
| H           | 1             | 2.11246991                | 1.54006934                | -0.09635325               |
| N           | 7             | 0.05430805                | -2.57314062               | 0.05567755                |
| O           | 8             | -1.02379966               | -3.16082001               | 0.08791073                |
| O           | 8             | 1.15500903                | -3.11810827               | 0.03817252                |
| C           | 6             | -0.05168004               | 3.12475657                | -0.05133451               |
| O           | 8             | -1.06583869               | 3.79219365                | -0.02035229               |
| H           | 1             | 0.94321316                | 3.60415411                | -0.11097953               |
| C           | 6             | -0.033602                 | 1.64410698                | 3.68369985                |
| C           | 6             | -1.23173916               | 0.92596388                | 3.74582100                |
| C           | 6             | -1.21003163               | -0.46084723               | 3.77117324                |
| C           | 6             | 0.02478168                | -1.10254896               | 3.73500371                |
| C           | 6             | 1.23131478                | -0.41665328               | 3.67739868                |
| C           | 6             | 1.19007099                | 0.97239947                | 3.65093517                |
| H           | 1             | -2.16701913               | 1.47059393                | 3.77150726                |
| H           | 1             | -2.11564064               | -1.04795659               | 3.81637812                |
| H           | 1             | 2.1607852                 | -0.96627808               | 3.65310121                |
| H           | 1             | 2.11246991                | 1.54006934                | 3.60364676                |
| N           | 7             | 0.05430805                | -2.57314062               | 3.75567746                |



|   |   |             |             |            |
|---|---|-------------|-------------|------------|
| O | 8 | -1.02379966 | -3.16082001 | 3.7879107  |
| O | 8 | 1.15500903  | -3.11810827 | 3.73817253 |
| C | 6 | -0.05168004 | 3.12475657  | 3.64866543 |
| O | 8 | -1.06583869 | 3.79219365  | 3.67964768 |
| H | 1 | 0.94321316  | 3.60415411  | 3.58902049 |

**PNB dimer in T-shaped configuration**

| Atomic type | Atomic number | Coordinates x (Angstroms) | Coordinates y (Angstroms) | Coordinates z (Angstroms) |
|-------------|---------------|---------------------------|---------------------------|---------------------------|
| C           | 6             | -0.033602                 | 1.64410698                | -0.01630000               |
| C           | 6             | -1.23173916               | 0.92596388                | 0.04582101                |
| C           | 6             | -1.21003163               | -0.46084723               | 0.07117305                |
| C           | 6             | 0.02478168                | -1.10254896               | 0.03500383                |
| C           | 6             | 1.23131478                | -0.41665328               | -0.02260136               |
| C           | 6             | 1.19007099                | 0.97239947                | -0.04906487               |
| H           | 1             | -2.16701913               | 1.47059393                | 0.07150730                |
| H           | 1             | -2.11564064               | -1.04795659               | 0.11637816                |
| H           | 1             | 2.1607852                 | -0.96627808               | -0.04689876               |
| H           | 1             | 2.11246991                | 1.54006934                | -0.09635325               |
| N           | 7             | 0.05430805                | -2.57314062               | 0.05567755                |
| O           | 8             | -1.02379966               | -3.16082001               | 0.08791073                |
| O           | 8             | 1.15500903                | -3.11810827               | 0.03817252                |
| C           | 6             | -0.05168004               | 3.12475657                | -0.05133451               |
| O           | 8             | -1.06583869               | 3.79219365                | -0.02035229               |
| H           | 1             | 0.94321316                | 3.60415411                | -0.11097953               |
| C           | 6             | 0.01096136                | -0.06886557               | 8.13452339                |
| C           | 6             | 0.0259201                 | 1.14027703                | 7.43247509                |
| C           | 6             | 0.0169307                 | 1.13842499                | 6.04529238                |
| C           | 6             | -0.00880557               | -0.08783601               | 5.38690424                |
| C           | 6             | -0.02834013               | -1.30467618               | 6.05654001                |
| C           | 6             | -0.01716258               | -1.28341413               | 7.44624949                |
| H           | 1             | 0.04637834                | 2.0682056                 | 7.98975468                |
| H           | 1             | 0.03054382                | 2.05284023                | 5.47037649                |
| H           | 1             | -0.04979254               | -2.22666001               | 5.49433136                |
| H           | 1             | -0.02940125               | -2.21445107               | 8.00152016                |
| N           | 7             | -0.01250733               | -0.09664917               | 3.91590214                |
| O           | 8             | 0.0238369                 | 0.98924112                | 3.34297657                |
| O           | 8             | -0.05050159               | -1.18924749               | 3.35588074                |
| C           | 6             | 0.02822374                | -0.07243063               | 9.61559296                |
| O           | 8             | 0.04631019                | 0.93291587                | 10.29669571               |

| H                                                    | 1             | 0.02533037                | -1.07537103               | 10.08174038               |
|------------------------------------------------------|---------------|---------------------------|---------------------------|---------------------------|
| <b>PNB dimer in parallel-displaced configuration</b> |               |                           |                           |                           |
| Atomic type                                          | Atomic number | Coordinates x (Angstroms) | Coordinates y (Angstroms) | Coordinates z (Angstroms) |
| C                                                    | 6             | -0.033602                 | 1.64410698                | -0.01630000               |
| C                                                    | 6             | -1.23173916               | 0.92596388                | 0.04582101                |
| C                                                    | 6             | -1.21003163               | -0.46084723               | 0.07117305                |
| C                                                    | 6             | 0.02478168                | -1.10254896               | 0.03500383                |
| C                                                    | 6             | 1.23131478                | -0.41665328               | -0.02260136               |
| C                                                    | 6             | 1.19007099                | 0.97239947                | -0.04906487               |
| H                                                    | 1             | -2.16701913               | 1.47059393                | 0.07150730                |
| H                                                    | 1             | -2.11564064               | -1.04795659               | 0.11637816                |
| H                                                    | 1             | 2.1607852                 | -0.96627808               | -0.04689876               |
| H                                                    | 1             | 2.11246991                | 1.54006934                | -0.09635325               |
| N                                                    | 7             | 0.05430805                | -2.57314062               | 0.05567755                |
| O                                                    | 8             | -1.02379966               | -3.16082001               | 0.08791073                |
| O                                                    | 8             | 1.15500903                | -3.11810827               | 0.03817252                |
| C                                                    | 6             | -0.05168004               | 3.12475657                | -0.05133451               |
| O                                                    | 8             | -1.06583869               | 3.79219365                | -0.02035229               |
| H                                                    | 1             | 0.94321316                | 3.60415411                | -0.11097953               |
| C                                                    | 6             | -0.08400372               | -2.94724822               | 3.71289301                |
| C                                                    | 6             | 1.13600528                | -2.26409507               | 3.71390748                |
| C                                                    | 6             | 1.15560675                | -0.87703431               | 3.72002363                |
| C                                                    | 6             | -0.06050561               | -0.19962825               | 3.72674775                |
| C                                                    | 6             | -1.28777194               | -0.85024267               | 3.73013091                |
| C                                                    | 6             | -1.28797555               | -2.24013638               | 3.72211194                |
| H                                                    | 1             | 2.05534935                | -2.83576035               | 3.70795727                |
| H                                                    | 1             | 2.07895708                | -0.31641844               | 3.71840024                |
| H                                                    | 1             | -2.20111036               | -0.27373865               | 3.73715091                |
| H                                                    | 1             | -2.22761869               | -2.78085399               | 3.72208118                |
| N                                                    | 7             | -0.04648366               | 1.27133822                | 3.72730422                |
| O                                                    | 8             | 1.048599                  | 1.82724953                | 3.70542598                |
| O                                                    | 8             | -1.13066995               | 1.84834206                | 3.74841189                |
| C                                                    | 6             | -0.1103629                | -4.42811918               | 3.69861937                |
| O                                                    | 8             | 0.88442117                | -5.12478971               | 3.69640946                |
| H                                                    | 1             | -1.12037241               | -4.87863016               | 3.68802595                |

**TABLE S4.** Cartesian coordinates at equilibrium points for p-nitrobenzaldehyde(PNB)-acetone in four different configurations.

| <b>PNB-acetone dimer in <i>trans</i>-sandwich configuration</b> |               |                           |                           |                           |
|-----------------------------------------------------------------|---------------|---------------------------|---------------------------|---------------------------|
| Atomic type                                                     | Atomic number | Coordinates x (Angstroms) | Coordinates y (Angstroms) | Coordinates z (Angstroms) |
| C                                                               | 6             | -0.01156624               | 0.11488955                | -0.00375815               |
| O                                                               | 8             | -0.00549363               | 1.34571910                | 0.01703516                |
| C                                                               | 6             | -1.30142164               | -0.67237544               | -0.03430550               |
| C                                                               | 6             | 1.27066004                | -0.68549097               | -0.00043462               |
| H                                                               | 1             | 2.12014818                | -0.01773864               | 0.21615320                |
| H                                                               | 1             | 1.21336973                | -1.50373590               | 0.74794924                |
| H                                                               | 1             | 1.40555763                | -1.15511274               | -0.99891937               |
| H                                                               | 1             | -2.14444351               | 0.01087671                | -0.22583377               |
| H                                                               | 1             | -1.43995047               | -1.17656708               | 0.94644451                |
| H                                                               | 1             | -1.2524308                | -1.46353769               | -0.81171566               |
| C                                                               | 6             | -0.084004                 | -1.74724805               | 3.71289301                |
| C                                                               | 6             | 1.13600504                | -1.06409478               | 3.71390796                |
| C                                                               | 6             | 1.15560651                | 0.32296583                | 3.72002411                |
| C                                                               | 6             | -0.06050586               | 1.00037193                | 3.72674799                |
| C                                                               | 6             | -1.28777218               | 0.34975743                | 3.73013091                |
| C                                                               | 6             | -1.28797579               | -1.04013634               | 3.72211170                |
| H                                                               | 1             | 2.05534911                | -1.63576019               | 3.70795774                |
| H                                                               | 1             | 2.07895684                | 0.88358164                | 3.71840119                |
| H                                                               | 1             | -2.2011106                | 0.92626148                | 3.73715067                |
| H                                                               | 1             | -2.22761893               | -1.58085394               | 3.72208071                |
| N                                                               | 7             | -0.04648391               | 2.47133827                | 3.7273047                 |
| O                                                               | 8             | 1.04859877                | 3.02724981                | 3.70542645                |
| O                                                               | 8             | -1.13067019               | 3.04834223                | 3.74841189                |
| C                                                               | 6             | -0.11036319               | -3.22811913               | 3.6986196                 |
| O                                                               | 8             | 0.88442081                | -3.92478967               | 3.69640994                |
| H                                                               | 1             | -1.12037265               | -3.67863035               | 3.68802595                |
| <b>PNB-acetone dimer in <i>cis</i>-sandwich configuration</b>   |               |                           |                           |                           |
| Atomic type                                                     | Atomic number | Coordinates x (Angstroms) | Coordinates y (Angstroms) | Coordinates z (Angstroms) |
| C                                                               | 6             | -0.01156624               | 0.11488955                | -0.00375815               |
| O                                                               | 8             | -0.00549363               | 1.34571910                | 0.01703516                |
| C                                                               | 6             | -1.30142164               | -0.67237544               | -0.03430550               |

|   |   |             |             |             |
|---|---|-------------|-------------|-------------|
| C | 6 | 1.27066004  | -0.68549097 | -0.00043462 |
| H | 1 | 2.12014818  | -0.01773864 | 0.21615320  |
| H | 1 | 1.21336973  | -1.50373590 | 0.74794924  |
| H | 1 | 1.40555763  | -1.15511274 | -0.99891937 |
| H | 1 | -2.14444351 | 0.01087671  | -0.22583377 |
| H | 1 | -1.43995047 | -1.17656708 | 0.94644451  |
| H | 1 | -1.2524308  | -1.46353769 | -0.81171566 |
| C | 6 | -0.033602   | 1.64410698  | 3.58369994  |
| C | 6 | -1.23173916 | 0.92596388  | 3.64582109  |
| C | 6 | -1.21003163 | -0.46084723 | 3.67117286  |
| C | 6 | 0.02478168  | -1.10254896 | 3.63500381  |
| C | 6 | 1.23131478  | -0.41665328 | 3.57739854  |
| C | 6 | 1.19007099  | 0.97239947  | 3.55093503  |
| H | 1 | -2.16701913 | 1.47059393  | 3.67150736  |
| H | 1 | -2.11564064 | -1.04795659 | 3.71637821  |
| H | 1 | 2.1607852   | -0.96627808 | 3.55310130  |
| H | 1 | 2.11246991  | 1.54006934  | 3.50364661  |
| N | 7 | 0.05430805  | -2.57314062 | 3.65567756  |
| O | 8 | -1.02379966 | -3.16082001 | 3.68791056  |
| O | 8 | 1.15500903  | -3.11810827 | 3.63817263  |
| C | 6 | -0.05168004 | 3.12475657  | 3.54866552  |
| O | 8 | -1.06583869 | 3.79219365  | 3.57964754  |
| H | 1 | 0.94321316  | 3.60415411  | 3.48902059  |

**PNB-acetone dimer in linear configuration**

| Atomic type | Atomic number | Coordinates x (Angstroms) | Coordinates y (Angstroms) | Coordinates z (Angstroms) |
|-------------|---------------|---------------------------|---------------------------|---------------------------|
| C           | 6             | -0.08279467               | -0.10084683               | 0.05917428                |
| O           | 8             | -0.05791965               | -1.33156693               | 0.04822838                |
| C           | 6             | 1.18652391                | 0.71865851                | 0.10025407                |
| C           | 6             | -1.38438761               | 0.66715783                | 0.03180335                |
| H           | 1             | -2.22420788               | -0.02694975               | 0.19718052                |
| H           | 1             | -1.37763679               | 1.46639562                | 0.80255550                |
| H           | 1             | -1.49207497               | 1.15966034                | -0.95893300               |
| H           | 1             | 2.05375934                | 0.06182724                | -0.07489625               |
| H           | 1             | 1.27340901                | 1.19988787                | 1.09832191                |
| H           | 1             | 1.1476779                 | 1.52874255                | -0.65800649               |
| C           | 6             | -0.033602                 | 8.84528065                | -0.01630000               |
| C           | 6             | -1.23173857               | 8.12713623                | 0.04582098                |
| C           | 6             | -1.21002984               | 6.74032497                | 0.07117288                |

|   |   |             |             |             |
|---|---|-------------|-------------|-------------|
| C | 6 | 0.0247841   | 6.09862471  | 0.03500356  |
| C | 6 | 1.23131657  | 6.78452158  | -0.02260161 |
| C | 6 | 1.19007158  | 8.17357445  | -0.04906497 |
| H | 1 | -2.16701913 | 8.67176533  | 0.07150734  |
| H | 1 | -2.11563826 | 6.15321493  | 0.11637796  |
| H | 1 | 2.16078758  | 6.23489714  | -0.04689910 |
| H | 1 | 2.11246991  | 8.74124527  | -0.09635334 |
| N | 7 | 0.05431177  | 4.62803316  | 0.05567713  |
| O | 8 | -1.02379549 | 4.04035282  | 0.08791029  |
| O | 8 | 1.1550132   | 4.08306646  | 0.03817201  |
| C | 6 | -0.05168134 | 10.3259306  | -0.05133436 |
| O | 8 | -1.06584048 | 10.99336624 | -0.02035205 |
| H | 1 | 0.94321144  | 10.80532837 | -0.11097936 |

**PNB-acetone dimer in parallel-displaced configuration**

| Atomic type | Atomic number | Coordinates x (Angstroms) | Coordinates y (Angstroms) | Coordinates z (Angstroms) |
|-------------|---------------|---------------------------|---------------------------|---------------------------|
| C           | 6             | -0.01156624               | 0.11488955                | -0.00375815               |
| O           | 8             | -0.00549363               | 1.34571910                | 0.01703516                |
| C           | 6             | -1.30142164               | -0.67237544               | -0.03430550               |
| C           | 6             | 1.27066004                | -0.68549097               | -0.00043462               |
| H           | 1             | 2.12014818                | -0.01773864               | 0.21615320                |
| H           | 1             | 1.21336973                | -1.50373590               | 0.74794924                |
| H           | 1             | 1.40555763                | -1.15511274               | -0.99891937               |
| H           | 1             | -2.14444351               | 0.01087671                | -0.22583377               |
| H           | 1             | -1.43995047               | -1.17656708               | 0.94644451                |
| H           | 1             | -1.2524308                | -1.46353769               | -0.81171566               |
| C           | 6             | -0.033602                 | 3.24410701                | 3.58369994                |
| C           | 6             | -1.23173916               | 2.52596402                | 3.64582109                |
| C           | 6             | -1.21003163               | 1.13915277                | 3.67117286                |
| C           | 6             | 0.02478168                | 0.49745110                | 3.63500381                |
| C           | 6             | 1.23131478                | 1.18334675                | 3.57739854                |
| C           | 6             | 1.19007099                | 2.57239962                | 3.55093503                |
| H           | 1             | -2.16701913               | 3.07059407                | 3.67150736                |
| H           | 1             | -2.11564064               | 0.55204344                | 3.71637821                |
| H           | 1             | 2.1607852                 | 0.63372195                | 3.55310130                |
| H           | 1             | 2.11246991                | 3.14006948                | 3.50364661                |
| N           | 7             | 0.05430805                | -0.97314066               | 3.65567756                |
| O           | 8             | -1.02379966               | -1.56081998               | 3.68791056                |
| O           | 8             | 1.15500903                | -1.51810837               | 3.63817263                |

|   |   |             |            |            |
|---|---|-------------|------------|------------|
| C | 6 | -0.05168004 | 4.72475672 | 3.54866552 |
| O | 8 | -1.06583869 | 5.39219379 | 3.57964754 |
| H | 1 | 0.94321316  | 5.20415401 | 3.48902059 |

**TABLE S5.** Cartesian coordinates at equilibrium points for p-nitrobenzaldehyde (PNB)-hexane in four different configurations.

| <b>PNB-hexane dimer in <i>trans</i>-sandwich configuration</b> |               |                           |                           |                           |
|----------------------------------------------------------------|---------------|---------------------------|---------------------------|---------------------------|
| Atomic type                                                    | Atomic number | Coordinates x (Angstroms) | Coordinates y (Angstroms) | Coordinates z (Angstroms) |
| C                                                              | 6             | -3.19168711               | 0.22053400                | -0.00007900               |
| C                                                              | 6             | 3.191679                  | -0.22064000               | -0.00010900               |
| C                                                              | 6             | -0.66249651               | 0.37542349                | 0.00008400                |
| C                                                              | 6             | 0.66248655                | -0.37553293               | 0.00013870                |
| C                                                              | 6             | 1.87529767                | 0.54650563                | 0.00002184                |
| C                                                              | 6             | -1.87530732               | -0.54661465               | -0.00003970               |
| H                                                              | 1             | 4.0495882                 | 0.45090935                | -0.00031807               |
| H                                                              | 1             | -4.04959822               | -0.45101309               | -0.00015142               |
| H                                                              | 1             | -3.26719499               | 0.85966712                | -0.88042289               |
| H                                                              | 1             | -3.26732731               | 0.85955530                | 0.88033670                |
| H                                                              | 1             | 3.26739216                | -0.85962069               | 0.88033277                |
| H                                                              | 1             | 3.26711679                | -0.85981274               | -0.88042748               |
| H                                                              | 1             | -1.82842422               | -1.19997871               | 0.87536758                |
| H                                                              | 1             | -1.82830048               | -1.19987381               | -0.87551820               |
| H                                                              | 1             | 1.82844031                | 1.19982517                | 0.87546831                |
| H                                                              | 1             | 1.8282634                 | 1.19980919                | -0.87541753               |
| H                                                              | 1             | -0.70737624               | 1.03037131                | -0.87630719               |
| H                                                              | 1             | -0.7075243                | 1.03030610                | 0.87652022                |
| H                                                              | 1             | 0.70745343                | -1.03037989               | 0.87660414                |
| H                                                              | 1             | 0.70742667                | -1.03051639               | -0.87622339               |
| C                                                              | 6             | 1.80318117                | 0.02855136                | -3.70364118               |
| C                                                              | 6             | 1.11072814                | -1.18617892               | -3.71143746               |
| C                                                              | 6             | -0.27645504               | -1.19517601               | -3.71229768               |
| C                                                              | 6             | -0.94457102               | 0.02607166                | -3.7069664                |
| C                                                              | 6             | -0.28461704               | 1.24834049                | -3.70338488               |
| C                                                              | 6             | 1.10525823                | 1.23790467                | -3.70078278               |
| H                                                              | 1             | 1.67537165                | -2.10986519               | -3.71483302               |
| H                                                              | 1             | -0.84409857               | -2.114218                 | -3.71563721               |

|   |   |             |             |             |
|---|---|-------------|-------------|-------------|
| H | 1 | -0.8541491  | 2.16606665  | -3.70108628 |
| H | 1 | 1.65313506  | 2.17337728  | -3.69558549 |
| N | 7 | -2.41559291 | 0.02324891  | -3.70189714 |
| O | 8 | -2.97976661 | -1.06770849 | -3.68633008 |
| O | 8 | -2.98437357 | 1.11192596  | -3.71236134 |
| C | 6 | 3.28425431  | 0.04352865  | -3.69493723 |
| O | 8 | 3.97330785  | -0.95651537 | -3.70314455 |
| H | 1 | 3.74250627  | 1.04996765  | -3.67828131 |

**PNB-hexane dimer in cross configuration**

| Atomic type | Atomic number | Coordinates x (Angstroms) | Coordinates y (Angstroms) | Coordinates z (Angstroms) |
|-------------|---------------|---------------------------|---------------------------|---------------------------|
| C           | 6             | -3.19168711               | 0.22053400                | -0.00007900               |
| C           | 6             | 3.191679                  | -0.22064000               | -0.00010900               |
| C           | 6             | -0.66249651               | 0.37542349                | 0.00008400                |
| C           | 6             | 0.66248655                | -0.37553293               | 0.00013870                |
| C           | 6             | 1.87529767                | 0.54650563                | 0.00002184                |
| C           | 6             | -1.87530732               | -0.54661465               | -0.00003970               |
| H           | 1             | 4.0495882                 | 0.45090935                | -0.00031807               |
| H           | 1             | -4.04959822               | -0.45101309               | -0.00015142               |
| H           | 1             | -3.26719499               | 0.85966712                | -0.88042289               |
| H           | 1             | -3.26732731               | 0.85955530                | 0.88033670                |
| H           | 1             | 3.26739216                | -0.85962069               | 0.88033277                |
| H           | 1             | 3.26711679                | -0.85981274               | -0.88042748               |
| H           | 1             | -1.82842422               | -1.19997871               | 0.87536758                |
| H           | 1             | -1.82830048               | -1.19987381               | -0.87551820               |
| H           | 1             | 1.82844031                | 1.19982517                | 0.87546831                |
| H           | 1             | 1.8282634                 | 1.19980919                | -0.87541753               |
| H           | 1             | -0.70737624               | 1.03037131                | -0.87630719               |
| H           | 1             | -0.7075243                | 1.03030610                | 0.87652022                |
| H           | 1             | 0.70745343                | -1.03037989               | 0.87660414                |
| H           | 1             | 0.70742667                | -1.03051639               | -0.87622339               |
| C           | 6             | -0.033602                 | 1.64410698                | 3.78369999                |
| C           | 6             | -1.23173916               | 0.92596388                | 3.84582114                |
| C           | 6             | -1.21003163               | -0.46084723               | 3.87117314                |
| C           | 6             | 0.02478168                | -1.10254896               | 3.83500385                |
| C           | 6             | 1.23131478                | -0.41665328               | 3.77739859                |
| C           | 6             | 1.19007099                | 0.97239947                | 3.75093508                |
| H           | 1             | -2.16701913               | 1.47059393                | 3.87150717                |
| H           | 1             | -2.11564064               | -1.04795659               | 3.91637826                |

|   |   |             |             |            |
|---|---|-------------|-------------|------------|
| H | 1 | 2.1607852   | -0.96627808 | 3.75310111 |
| H | 1 | 2.11246991  | 1.54006934  | 3.70364666 |
| N | 7 | 0.05430805  | -2.57314062 | 3.8556776  |
| O | 8 | -1.02379966 | -3.16082001 | 3.88791084 |
| O | 8 | 1.15500903  | -3.11810827 | 3.83817244 |
| C | 6 | -0.05168004 | 3.12475657  | 3.74866533 |
| O | 8 | -1.06583869 | 3.79219365  | 3.77964759 |
| H | 1 | 0.94321316  | 3.60415411  | 3.6890204  |

**PNB-hexane dimer in T-shaped configuration**

| Atomic type | Atomic number | Coordinates x (Angstroms) | Coordinates y (Angstroms) | Coordinates z (Angstroms) |
|-------------|---------------|---------------------------|---------------------------|---------------------------|
| C           | 6             | -3.19168711               | 0.22053400                | -0.00007900               |
| C           | 6             | 3.191679                  | -0.22064000               | -0.00010900               |
| C           | 6             | -0.66249651               | 0.37542349                | 0.00008400                |
| C           | 6             | 0.66248655                | -0.37553293               | 0.00013870                |
| C           | 6             | 1.87529767                | 0.54650563                | 0.00002184                |
| C           | 6             | -1.87530732               | -0.54661465               | -0.00003970               |
| H           | 1             | 4.0495882                 | 0.45090935                | -0.00031807               |
| H           | 1             | -4.04959822               | -0.45101309               | -0.00015142               |
| H           | 1             | -3.26719499               | 0.85966712                | -0.88042289               |
| H           | 1             | -3.26732731               | 0.85955530                | 0.88033670                |
| H           | 1             | 3.26739216                | -0.85962069               | 0.88033277                |
| H           | 1             | 3.26711679                | -0.85981274               | -0.88042748               |
| H           | 1             | -1.82842422               | -1.19997871               | 0.87536758                |
| H           | 1             | -1.82830048               | -1.19987381               | -0.87551820               |
| H           | 1             | 1.82844031                | 1.19982517                | 0.87546831                |
| H           | 1             | 1.8282634                 | 1.19980919                | -0.87541753               |
| H           | 1             | -0.70737624               | 1.03037131                | -0.87630719               |
| H           | 1             | -0.7075243                | 1.03030610                | 0.87652022                |
| H           | 1             | 0.70745343                | -1.03037989               | 0.87660414                |
| H           | 1             | 0.70742667                | -1.03051639               | -0.87622339               |
| C           | 6             | -0.06233003               | 0.03278028                | -8.11263275               |
| C           | 6             | -1.26833355               | 0.0513114                 | -7.4052906                |
| C           | 6             | -1.26060188               | 0.03391496                | -6.0182085                |
| C           | 6             | -0.03164908               | -0.0003097                | -5.3652482                |
| C           | 6             | 1.1823529                 | -0.01518177               | -6.04013443               |
| C           | 6             | 1.15513086                | 0.00082757                | -7.42969227               |
| H           | 1             | -2.19857287               | 0.07734746                | -7.95846987               |
| H           | 1             | -2.17255664               | 0.04479647                | -5.43934059               |



|   |   |             |             |              |
|---|---|-------------|-------------|--------------|
| H | 1 | 2.1067102   | -0.04008803 | -5.48197985  |
| H | 1 | 2.08372045  | -0.01244288 | -7.98902273  |
| N | 7 | -0.01683223 | -0.02484776 | -3.89449406  |
| O | 8 | -1.10102141 | -0.03000304 | -3.3172338   |
| O | 8 | 1.07864249  | -0.03978819 | -3.33902097  |
| C | 6 | -0.0653441  | 0.04348224  | -9.59376621  |
| O | 8 | -1.07334411 | 0.07723179  | -10.2703352  |
| H | 1 | 0.93508697  | 0.01640272  | -10.06450558 |

**PNB-hexane dimer in parallel-displaced configuration**

| Atomic type | Atomic number | Coordinates x (Angstroms) | Coordinates y (Angstroms) | Coordinates z (Angstroms) |
|-------------|---------------|---------------------------|---------------------------|---------------------------|
| C           | 6             | -3.19168711               | 0.22053400                | -0.00007900               |
| C           | 6             | 3.191679                  | -0.22064000               | -0.00010900               |
| C           | 6             | -0.66249651               | 0.37542349                | 0.00008400                |
| C           | 6             | 0.66248655                | -0.37553293               | 0.00013870                |
| C           | 6             | 1.87529767                | 0.54650563                | 0.00002184                |
| C           | 6             | -1.87530732               | -0.54661465               | -0.00003970               |
| H           | 1             | 4.0495882                 | 0.45090935                | -0.00031807               |
| H           | 1             | -4.04959822               | -0.45101309               | -0.00015142               |
| H           | 1             | -3.26719499               | 0.85966712                | -0.88042289               |
| H           | 1             | -3.26732731               | 0.85955530                | 0.88033670                |
| H           | 1             | 3.26739216                | -0.85962069               | 0.88033277                |
| H           | 1             | 3.26711679                | -0.85981274               | -0.88042748               |
| H           | 1             | -1.82842422               | -1.19997871               | 0.87536758                |
| H           | 1             | -1.82830048               | -1.19987381               | -0.87551820               |
| H           | 1             | 1.82844031                | 1.19982517                | 0.87546831                |
| H           | 1             | 1.8282634                 | 1.19980919                | -0.87541753               |
| H           | 1             | -0.70737624               | 1.03037131                | -0.87630719               |
| H           | 1             | -0.7075243                | 1.03030610                | 0.87652022                |
| H           | 1             | 0.70745343                | -1.03037989               | 0.87660414                |
| H           | 1             | 0.70742667                | -1.03051639               | -0.87622339               |
| C           | 6             | 2.10318112                | 0.02855136                | -3.70364118               |
| C           | 6             | 1.41072822                | -1.18617892               | -3.71143746               |
| C           | 6             | 0.02354494                | -1.19517601               | -3.71229768               |
| C           | 6             | -0.64457107               | 0.02607166                | -3.7069664                |
| C           | 6             | 0.01538296                | 1.24834049                | -3.70338488               |
| C           | 6             | 1.40525818                | 1.23790467                | -3.70078278               |
| H           | 1             | 1.9753716                 | -2.10986519               | -3.71483302               |
| H           | 1             | -0.54409856               | -2.114218                 | -3.71563721               |

|   |   |             |             |             |
|---|---|-------------|-------------|-------------|
| H | 1 | -0.55414903 | 2.16606665  | -3.70108628 |
| H | 1 | 1.95313501  | 2.17337728  | -3.69558549 |
| N | 7 | -2.11559296 | 0.02324891  | -3.70189714 |
| O | 8 | -2.67976642 | -1.06770849 | -3.68633008 |
| O | 8 | -2.68437362 | 1.11192596  | -3.71236134 |
| C | 6 | 3.5842545   | 0.04352865  | -3.69493723 |
| O | 8 | 4.27330732  | -0.95651537 | -3.70314455 |
| H | 1 | 4.04250622  | 1.04996765  | -3.67828131 |

**TABLE S6.** Cartesian coordinates at equilibrium points for p-nitrobenzaldehyde (PNB)-silanol in five different configurations.

| <b>PNB-silanol dimer in <i>trans</i>-sandwich configuration</b> |               |                           |                           |                           |
|-----------------------------------------------------------------|---------------|---------------------------|---------------------------|---------------------------|
| Atomic type                                                     | Atomic number | Coordinates x (Angstroms) | Coordinates y (Angstroms) | Coordinates z (Angstroms) |
| C                                                               | 6             | -0.033602                 | 1.64410698                | -0.01630000               |
| C                                                               | 6             | -1.23173916               | 0.92596388                | 0.04582101                |
| C                                                               | 6             | -1.21003163               | -0.46084723               | 0.07117299                |
| C                                                               | 6             | 0.02478168                | -1.10254896               | 0.03500372                |
| C                                                               | 6             | 1.23131478                | -0.41665328               | -0.02260148               |
| C                                                               | 6             | 1.19007099                | 0.97239947                | -0.04906493               |
| H                                                               | 1             | -2.16701913               | 1.47059393                | 0.07150734                |
| H                                                               | 1             | -2.11564064               | -1.04795659               | 0.11637810                |
| H                                                               | 1             | 2.1607852                 | -0.96627808               | -0.04689892               |
| H                                                               | 1             | 2.11246991                | 1.54006934                | -0.09635331               |
| N                                                               | 7             | 0.05430805                | -2.57314062               | 0.05567738                |
| O                                                               | 8             | -1.02379966               | -3.16082001               | 0.08791056                |
| O                                                               | 8             | 1.15500903                | -3.11810827               | 0.03817230                |
| C                                                               | 6             | -0.05168004               | 3.12475657                | -0.05133445               |
| O                                                               | 8             | -1.06583869               | 3.79219365                | -0.02035218               |
| H                                                               | 1             | 0.94321316                | 3.60415411                | -0.11097947               |
| Si                                                              | 14            | -0.00687177               | -0.54508191               | 3.83212805                |
| O                                                               | 8             | 0.00502312                | 1.10882843                | 3.92028499                |
| H                                                               | 1             | -1.21073496               | -1.04529309               | 3.13234758                |
| H                                                               | 1             | 0.03155539                | -1.16247976               | 5.17620516                |
| H                                                               | 1             | 1.20211661                | -0.90869278               | 3.0758729                 |
| H                                                               | 1             | -0.71340752               | 1.54358304                | 4.38102722                |

| <b>PNB-silanol dimer in <i>cis</i>-sandwich configuration</b> |               |                           |                           |                           |
|---------------------------------------------------------------|---------------|---------------------------|---------------------------|---------------------------|
| Atomic type                                                   | Atomic number | Coordinates x (Angstroms) | Coordinates y (Angstroms) | Coordinates z (Angstroms) |
| C                                                             | 6             | -0.033602                 | 1.64410698                | -0.01630000               |
| C                                                             | 6             | -1.23173916               | 0.92596388                | 0.04582101                |
| C                                                             | 6             | -1.21003163               | -0.46084723               | 0.07117299                |
| C                                                             | 6             | 0.02478168                | -1.10254896               | 0.03500372                |
| C                                                             | 6             | 1.23131478                | -0.41665328               | -0.02260148               |
| C                                                             | 6             | 1.19007099                | 0.97239947                | -0.04906493               |
| H                                                             | 1             | -2.16701913               | 1.47059393                | 0.07150734                |
| H                                                             | 1             | -2.11564064               | -1.04795659               | 0.11637810                |
| H                                                             | 1             | 2.1607852                 | -0.96627808               | -0.04689892               |
| H                                                             | 1             | 2.11246991                | 1.54006934                | -0.09635331               |
| N                                                             | 7             | 0.05430805                | -2.57314062               | 0.05567738                |
| O                                                             | 8             | -1.02379966               | -3.16082001               | 0.08791056                |
| O                                                             | 8             | 1.15500903                | -3.11810827               | 0.03817230                |
| C                                                             | 6             | -0.05168004               | 3.12475657                | -0.05133445               |
| O                                                             | 8             | -1.06583869               | 3.79219365                | -0.02035218               |
| H                                                             | 1             | 0.94321316                | 3.60415411                | -0.11097947               |
| Si                                                            | 14            | -0.01146683               | 0.55444044                | 3.83347726                |
| O                                                             | 8             | -0.05298518               | -1.10127425               | 3.81871843                |
| H                                                             | 1             | 1.19814587                | 1.07569063                | 3.15944004                |
| H                                                             | 1             | -0.03269059               | 1.08755589                | 5.21352720                |
| H                                                             | 1             | -1.21701527               | 0.98593217                | 3.10804248                |
| H                                                             | 1             | 0.6594829                 | -1.57661355               | 4.24752998                |

| <b>PNB-silanol dimer in linear (1) configuration</b> |               |                           |                           |                           |
|------------------------------------------------------|---------------|---------------------------|---------------------------|---------------------------|
| Atomic type                                          | Atomic number | Coordinates x (Angstroms) | Coordinates y (Angstroms) | Coordinates z (Angstroms) |
| C                                                    | 6             | -0.033602                 | 1.64410698                | -0.01630000               |
| C                                                    | 6             | -1.23173916               | 0.92596388                | 0.04582101                |
| C                                                    | 6             | -1.21003163               | -0.46084723               | 0.07117299                |
| C                                                    | 6             | 0.02478168                | -1.10254896               | 0.03500372                |
| C                                                    | 6             | 1.23131478                | -0.41665328               | -0.02260148               |
| C                                                    | 6             | 1.19007099                | 0.97239947                | -0.04906493               |
| H                                                    | 1             | -2.16701913               | 1.47059393                | 0.07150734                |
| H                                                    | 1             | -2.11564064               | -1.04795659               | 0.11637810                |
| H                                                    | 1             | 2.1607852                 | -0.96627808               | -0.04689892               |
| H                                                    | 1             | 2.11246991                | 1.54006934                | -0.09635331               |

|    |    |             |             |             |
|----|----|-------------|-------------|-------------|
| N  | 7  | 0.05430805  | -2.57314062 | 0.05567738  |
| O  | 8  | -1.02379966 | -3.16082001 | 0.08791056  |
| O  | 8  | 1.15500903  | -3.11810827 | 0.03817230  |
| C  | 6  | -0.05168004 | 3.12475657  | -0.05133445 |
| O  | 8  | -1.06583869 | 3.79219365  | -0.02035218 |
| H  | 1  | 0.94321316  | 3.60415411  | -0.11097947 |
| Si | 14 | -0.02931391 | -6.29414415 | -0.00377521 |
| O  | 8  | -0.02424956 | -7.95041609 | 0.00461132  |
| H  | 1  | 1.09525168  | -5.74932718 | -0.79606146 |
| H  | 1  | 0.06527882  | -5.74221897 | 1.36576164  |
| H  | 1  | -1.31026995 | -5.90649748 | -0.61587834 |
| H  | 1  | 0.73914993  | -8.39973545 | 0.36898831  |

**PNB-silanol dimer in linear (2) configuration**

| Atomic type | Atomic number | Coordinates x (Angstroms) | Coordinates y (Angstroms) | Coordinates z (Angstroms) |
|-------------|---------------|---------------------------|---------------------------|---------------------------|
| C           | 6             | -0.033602                 | 1.64410698                | -0.01630000               |
| C           | 6             | -1.23173916               | 0.92596388                | 0.04582101                |
| C           | 6             | -1.21003163               | -0.46084723               | 0.07117299                |
| C           | 6             | 0.02478168                | -1.10254896               | 0.03500372                |
| C           | 6             | 1.23131478                | -0.41665328               | -0.02260148               |
| C           | 6             | 1.19007099                | 0.97239947                | -0.04906493               |
| H           | 1             | -2.16701913               | 1.47059393                | 0.07150734                |
| H           | 1             | -2.11564064               | -1.04795659               | 0.11637810                |
| H           | 1             | 2.1607852                 | -0.96627808               | -0.04689892               |
| H           | 1             | 2.11246991                | 1.54006934                | -0.09635331               |
| N           | 7             | 0.05430805                | -2.57314062               | 0.05567738                |
| O           | 8             | -1.02379966               | -3.16082001               | 0.08791056                |
| O           | 8             | 1.15500903                | -3.11810827               | 0.03817230                |
| C           | 6             | -0.05168004               | 3.12475657                | -0.05133445               |
| O           | 8             | -1.06583869               | 3.79219365                | -0.02035218               |
| H           | 1             | 0.94321316                | 3.60415411                | -0.11097947               |
| Si          | 14            | -0.00687177               | 6.95491791                | -0.06787180               |
| O           | 8             | 0.00502312                | 8.60882854                | 0.02028517                |
| H           | 1             | -1.21073496               | 6.45470667                | -0.76765239               |
| H           | 1             | 0.03155539                | 6.33752012                | 1.27620542                |
| H           | 1             | 1.20211661                | 6.59130716                | -0.8241272                |
| H           | 1             | -0.71340752               | 9.04358292                | 0.4810271                 |

**PNB-silanol dimer in T-shaped configuration**

| Atomic type | Atomic number | Coordinates x (Angstroms) | Coordinates y (Angstroms) | Coordinates z (Angstroms) |
|-------------|---------------|---------------------------|---------------------------|---------------------------|
| C           | 6             | -0.0671961                | 0.02053264                | 1.73791921                |
| C           | 6             | 1.14079487                | 0.00704111                | 1.03386140                |
| C           | 6             | 1.13650882                | 0.00708989                | -0.35334459               |
| C           | 6             | -0.09099697               | 0.02251488                | -1.00973237               |
| C           | 6             | -1.30676389               | 0.04033528                | -0.33810261               |
| C           | 6             | -1.28305292               | 0.03821080                | 1.05161035                |
| H           | 1             | 2.06977201                | -0.00523411               | 1.58963203                |
| H           | 1             | 2.04998875                | -0.00569681               | -0.92976433               |
| H           | 1             | -2.22980976               | 0.05360233                | -0.89881927               |
| H           | 1             | -2.2131815                | 0.04941431                | 1.60842288                |
| N           | 7             | -0.10236207               | 0.01670206                | -2.48071027               |
| O           | 8             | 0.98270673                | -0.01795317               | -3.05529451               |
| O           | 8             | -1.19609857               | 0.04567974                | -3.03904676               |
| C           | 6             | -0.06812438               | 0.01278881                | 3.21907306                |
| O           | 8             | 0.93847108                | 0.00406584                | 3.89851356                |
| H           | 1             | -1.07026243               | 0.01371753                | 3.68695164                |
| Si          | 14            | 0.04698287                | -0.56340873               | 7.07712793                |
| O           | 8             | -0.01601957               | 1.09148359                | 7.05076361                |
| H           | 1             | 1.22745275                | -1.07594347               | 6.34706640                |
| H           | 1             | -1.16229618               | -1.16423821               | 6.47227383                |
| H           | 1             | 0.13559622                | -0.93237406               | 8.49902821                |
| H           | 1             | -0.07598723               | 1.5295409                 | 6.20108891                |

**TABLE S7.** Cartesian coordinates at equilibrium points for p-nitrobenzaldehyde (PNB)-propylamine in four different configurations.

| <b>PNB-propylamine dimer in <i>trans</i>-sandwich configuration</b> |               |                           |                           |                           |
|---------------------------------------------------------------------|---------------|---------------------------|---------------------------|---------------------------|
| Atomic type                                                         | Atomic number | Coordinates x (Angstroms) | Coordinates y (Angstroms) | Coordinates z (Angstroms) |
| C                                                                   | 6             | -0.033602                 | 1.64410698                | -0.01630000               |
| C                                                                   | 6             | -1.23173916               | 0.92596388                | 0.04582101                |
| C                                                                   | 6             | -1.21003163               | -0.46084723               | 0.07117299                |
| C                                                                   | 6             | 0.02478168                | -1.10254896               | 0.03500372                |
| C                                                                   | 6             | 1.23131478                | -0.41665328               | -0.02260148               |
| C                                                                   | 6             | 1.19007099                | 0.97239947                | -0.04906493               |

|   |   |             |             |             |
|---|---|-------------|-------------|-------------|
| H | 1 | -2.16701913 | 1.47059393  | 0.07150734  |
| H | 1 | -2.11564064 | -1.04795659 | 0.11637810  |
| H | 1 | 2.1607852   | -0.96627808 | -0.04689892 |
| H | 1 | 2.11246991  | 1.54006934  | -0.09635331 |
| N | 7 | 0.05430805  | -2.57314062 | 0.05567738  |
| O | 8 | -1.02379966 | -3.16082001 | 0.08791056  |
| O | 8 | 1.15500903  | -3.11810827 | 0.03817230  |
| C | 6 | -0.05168004 | 3.12475657  | -0.05133445 |
| O | 8 | -1.06583869 | 3.79219365  | -0.02035218 |
| H | 1 | 0.94321316  | 3.60415411  | -0.11097947 |
| C | 6 | -0.13993451 | 1.95265615  | 3.89711452  |
| C | 6 | 0.52693677  | 0.58340853  | 3.84940410  |
| C | 6 | -0.48673043 | -0.55169493 | 3.95597100  |
| N | 7 | 0.06303596  | -1.90412688 | 3.91899276  |
| H | 1 | -0.68678081 | 2.08591866  | 4.83103609  |
| H | 1 | -0.85032099 | 2.06736565  | 3.07784796  |
| H | 1 | 0.58918822  | 2.75793338  | 3.82059407  |
| H | 1 | -1.21291554 | -0.46444827 | 3.14448857  |
| H | 1 | -1.05052102 | -0.44601154 | 4.88571596  |
| H | 1 | 1.08786893  | 0.47152942  | 2.91754699  |
| H | 1 | 1.25072706  | 0.48999804  | 4.66360474  |
| H | 1 | 0.72788608  | -2.03167534 | 4.67347097  |
| H | 1 | 0.57713336  | -2.04880023 | 3.05742478  |

**PNB-propylamine dimer in *cis*-sandwich configuration**

| Atomic type | Atomic number | Coordinates x (Angstroms) | Coordinates y (Angstroms) | Coordinates z (Angstroms) |
|-------------|---------------|---------------------------|---------------------------|---------------------------|
| C           | 6             | -0.033602                 | 1.64410698                | -0.01630000               |
| C           | 6             | -1.23173916               | 0.92596388                | 0.04582101                |
| C           | 6             | -1.21003163               | -0.46084723               | 0.07117299                |
| C           | 6             | 0.02478168                | -1.10254896               | 0.03500372                |
| C           | 6             | 1.23131478                | -0.41665328               | -0.02260148               |
| C           | 6             | 1.19007099                | 0.97239947                | -0.04906493               |
| H           | 1             | -2.16701913               | 1.47059393                | 0.07150734                |
| H           | 1             | -2.11564064               | -1.04795659               | 0.11637810                |
| H           | 1             | 2.1607852                 | -0.96627808               | -0.04689892               |
| H           | 1             | 2.11246991                | 1.54006934                | -0.09635331               |
| N           | 7             | 0.05430805                | -2.57314062               | 0.05567738                |
| O           | 8             | -1.02379966               | -3.16082001               | 0.08791056                |
| O           | 8             | 1.15500903                | -3.11810827               | 0.03817230                |

|   |   |             |             |             |
|---|---|-------------|-------------|-------------|
| C | 6 | -0.05168004 | 3.12475657  | -0.05133445 |
| O | 8 | -1.06583869 | 3.79219365  | -0.02035218 |
| H | 1 | 0.94321316  | 3.60415411  | -0.11097947 |
| C | 6 | -0.21175505 | -1.90127134 | 3.80539203  |
| C | 6 | 0.47049591  | -0.53888398 | 3.78905630  |
| C | 6 | -0.53679085 | 0.60668546  | 3.80859113  |
| N | 7 | 0.02772497  | 1.95346439  | 3.79476881  |
| H | 1 | -0.8625955  | -2.02005267 | 2.9386127   |
| H | 1 | -0.82555431 | -2.01750112 | 4.69911766  |
| H | 1 | 0.51288033  | -2.71407652 | 3.79130888  |
| H | 1 | -1.16688335 | 0.51814216  | 4.69662476  |
| H | 1 | -1.20370173 | 0.51559782  | 2.94813347  |
| H | 1 | 1.13487196  | -0.44159555 | 4.6519928   |
| H | 1 | 1.09796476  | -0.44412774 | 2.89864945  |
| H | 1 | 0.60378563  | 2.08231091  | 2.97070336  |
| H | 1 | 0.63792413  | 2.08468604  | 4.59349537  |

**PNB-propylamine dimer in linear configuration**

| Atomic type | Atomic number | Coordinates x (Angstroms) | Coordinates y (Angstroms) | Coordinates z (Angstroms) |
|-------------|---------------|---------------------------|---------------------------|---------------------------|
| C           | 6             | -0.033602                 | 1.64410698                | -0.01630000               |
| C           | 6             | -1.23173916               | 0.92596388                | 0.04582101                |
| C           | 6             | -1.21003163               | -0.46084723               | 0.07117299                |
| C           | 6             | 0.02478168                | -1.10254896               | 0.03500372                |
| C           | 6             | 1.23131478                | -0.41665328               | -0.02260148               |
| C           | 6             | 1.19007099                | 0.97239947                | -0.04906493               |
| H           | 1             | -2.16701913               | 1.47059393                | 0.07150734                |
| H           | 1             | -2.11564064               | -1.04795659               | 0.11637810                |
| H           | 1             | 2.1607852                 | -0.96627808               | -0.04689892               |
| H           | 1             | 2.11246991                | 1.54006934                | -0.09635331               |
| N           | 7             | 0.05430805                | -2.57314062               | 0.05567738                |
| O           | 8             | -1.02379966               | -3.16082001               | 0.08791056                |
| O           | 8             | 1.15500903                | -3.11810827               | 0.03817230                |
| C           | 6             | -0.05168004               | 3.12475657                | -0.05133445               |
| O           | 8             | -1.06583869               | 3.79219365                | -0.02035218               |
| H           | 1             | 0.94321316                | 3.60415411                | -0.11097947               |
| C           | 6             | -0.13993451               | -6.64734411               | -0.00288539               |
| C           | 6             | 0.52693677                | -8.01659107               | -0.05059590               |
| C           | 6             | -0.48673043               | -9.15169430               | 0.05597094                |
| N           | 7             | 0.06303596                | -10.50412750              | 0.01899264                |

|   |   |             |              |             |
|---|---|-------------|--------------|-------------|
| H | 1 | -0.68678081 | -6.51408148  | 0.93103594  |
| H | 1 | -0.85032099 | -6.53263426  | -0.82215202 |
| H | 1 | 0.58918822  | -5.84206629  | -0.07940608 |
| H | 1 | -1.21291554 | -9.06444836  | -0.7555114  |
| H | 1 | -1.05052102 | -9.04601097  | 0.98571581  |
| H | 1 | 1.08786893  | -8.12847042  | -0.98245311 |
| H | 1 | 1.25072706  | -8.11000252  | 0.76360458  |
| H | 1 | 0.72788608  | -10.63167572 | 0.77347076  |
| H | 1 | 0.57713336  | -10.6487999  | -0.84257519 |

**PNB-propylamine dimer in parallel-displaced configuration**

| Atomic type | Atomic number | Coordinates x (Angstroms) | Coordinates y (Angstroms) | Coordinates z (Angstroms) |
|-------------|---------------|---------------------------|---------------------------|---------------------------|
| C           | 6             | -0.033602                 | 1.64410698                | -0.01630000               |
| C           | 6             | -1.23173916               | 0.92596388                | 0.04582101                |
| C           | 6             | -1.21003163               | -0.46084723               | 0.07117299                |
| C           | 6             | 0.02478168                | -1.10254896               | 0.03500372                |
| C           | 6             | 1.23131478                | -0.41665328               | -0.02260148               |
| C           | 6             | 1.19007099                | 0.97239947                | -0.04906493               |
| H           | 1             | -2.16701913               | 1.47059393                | 0.07150734                |
| H           | 1             | -2.11564064               | -1.04795659               | 0.11637810                |
| H           | 1             | 2.1607852                 | -0.96627808               | -0.04689892               |
| H           | 1             | 2.11246991                | 1.54006934                | -0.09635331               |
| N           | 7             | 0.05430805                | -2.57314062               | 0.05567738                |
| O           | 8             | -1.02379966               | -3.16082001               | 0.08791056                |
| O           | 8             | 1.15500903                | -3.11810827               | 0.03817230                |
| C           | 6             | -0.05168004               | 3.12475657                | -0.05133445               |
| O           | 8             | -1.06583869               | 3.79219365                | -0.02035218               |
| H           | 1             | 0.94321316                | 3.60415411                | -0.11097947               |
| C           | 6             | -0.21175505               | -3.90127134               | 3.70539188                |
| C           | 6             | 0.47049591                | -2.53888392               | 3.68905640                |
| C           | 6             | -0.53679085               | -1.39331460               | 3.70859122                |
| N           | 7             | 0.02772497                | -0.04653564               | 3.69476891                |
| H           | 1             | -0.8625955                | -4.02005243               | 2.83861256                |
| H           | 1             | -0.82555431               | -4.01750088               | 4.59911776                |
| H           | 1             | 0.51288033                | -4.71407652               | 3.69130874                |
| H           | 1             | -1.16688335               | -1.4818579                | 4.59662485                |
| H           | 1             | -1.20370173               | -1.48440218               | 2.84813356                |
| H           | 1             | 1.13487196                | -2.44159555               | 4.55199289                |
| H           | 1             | 1.09796476                | -2.44412756               | 2.79864931                |



|   |   |            |            |            |
|---|---|------------|------------|------------|
| H | 1 | 0.60378563 | 0.08231089 | 2.87070346 |
| H | 1 | 0.63792413 | 0.0846861  | 4.49349499 |

**TABLE S8.** Cartesian coordinates at equilibrium points for acetone-hexane in three different configurations.

| <b>Acetone-hexane dimer in <i>trans</i>-sandwich configuration</b> |               |                           |                           |                           |
|--------------------------------------------------------------------|---------------|---------------------------|---------------------------|---------------------------|
| Atomic type                                                        | Atomic number | Coordinates x (Angstroms) | Coordinates y (Angstroms) | Coordinates z (Angstroms) |
| C                                                                  | 6             | -3.19168711               | 0.22053400                | -0.00007900               |
| C                                                                  | 6             | 3.191679                  | -0.22064000               | -0.00010900               |
| C                                                                  | 6             | -0.66249651               | 0.37542349                | 0.00008400                |
| C                                                                  | 6             | 0.66248655                | -0.37553293               | 0.00013870                |
| C                                                                  | 6             | 1.87529767                | 0.54650563                | 0.00002184                |
| C                                                                  | 6             | -1.87530732               | -0.54661465               | -0.00003970               |
| H                                                                  | 1             | 4.0495882                 | 0.45090935                | -0.00031807               |
| H                                                                  | 1             | -4.04959822               | -0.45101309               | -0.00015142               |
| H                                                                  | 1             | -3.26719499               | 0.85966712                | -0.88042289               |
| H                                                                  | 1             | -3.26732731               | 0.85955530                | 0.88033670                |
| H                                                                  | 1             | 3.26739216                | -0.85962069               | 0.88033277                |
| H                                                                  | 1             | 3.26711679                | -0.85981274               | -0.88042748               |
| H                                                                  | 1             | -1.82842422               | -1.19997871               | 0.87536758                |
| H                                                                  | 1             | -1.82830048               | -1.19987381               | -0.87551820               |
| H                                                                  | 1             | 1.82844031                | 1.19982517                | 0.87546831                |
| H                                                                  | 1             | 1.8282634                 | 1.19980919                | -0.87541753               |
| H                                                                  | 1             | -0.70737624               | 1.03037131                | -0.87630719               |
| H                                                                  | 1             | -0.7075243                | 1.03030610                | 0.87652022                |
| H                                                                  | 1             | 0.70745343                | -1.03037989               | 0.87660414                |
| H                                                                  | 1             | 0.70742667                | -1.03051639               | -0.87622339               |
| C                                                                  | 6             | -0.01156624               | 0.11488955                | 3.79624176                |
| O                                                                  | 8             | -0.00549363               | 1.3457191                 | 3.8170352                 |
| C                                                                  | 6             | -1.30142164               | -0.67237544               | 3.76569462                |
| C                                                                  | 6             | 1.27066004                | -0.68549097               | 3.79956555                |
| H                                                                  | 1             | 2.12014818                | -0.01773864               | 4.01615334                |
| H                                                                  | 1             | 1.21336973                | -1.5037359                | 4.54794884                |
| H                                                                  | 1             | 1.40555763                | -1.15511274               | 2.8010807                 |
| H                                                                  | 1             | -2.14444351               | 0.01087671                | 3.5741663                 |
| H                                                                  | 1             | -1.43995047               | -1.17656708               | 4.7464447                 |

| H                                                       | 1             | -1.2524308                | -1.46353769               | 2.98828435                |
|---------------------------------------------------------|---------------|---------------------------|---------------------------|---------------------------|
| <b>Acetone-hexane dimer in linear (1) configuration</b> |               |                           |                           |                           |
| Atomic type                                             | Atomic number | Coordinates x (Angstroms) | Coordinates y (Angstroms) | Coordinates z (Angstroms) |
| C                                                       | 6             | -3.19168711               | 0.22053400                | -0.00007900               |
| C                                                       | 6             | 3.191679                  | -0.22064000               | -0.00010900               |
| C                                                       | 6             | -0.66249651               | 0.37542349                | 0.00008400                |
| C                                                       | 6             | 0.66248655                | -0.37553293               | 0.00013870                |
| C                                                       | 6             | 1.87529767                | 0.54650563                | 0.00002184                |
| C                                                       | 6             | -1.87530732               | -0.54661465               | -0.00003970               |
| H                                                       | 1             | 4.0495882                 | 0.45090935                | -0.00031807               |
| H                                                       | 1             | -4.04959822               | -0.45101309               | -0.00015142               |
| H                                                       | 1             | -3.26719499               | 0.85966712                | -0.88042289               |
| H                                                       | 1             | -3.26732731               | 0.85955530                | 0.88033670                |
| H                                                       | 1             | 3.26739216                | -0.85962069               | 0.88033277                |
| H                                                       | 1             | 3.26711679                | -0.85981274               | -0.88042748               |
| H                                                       | 1             | -1.82842422               | -1.19997871               | 0.87536758                |
| H                                                       | 1             | -1.82830048               | -1.19987381               | -0.87551820               |
| H                                                       | 1             | 1.82844031                | 1.19982517                | 0.87546831                |
| H                                                       | 1             | 1.8282634                 | 1.19980919                | -0.87541753               |
| H                                                       | 1             | -0.70737624               | 1.03037131                | -0.87630719               |
| H                                                       | 1             | -0.7075243                | 1.03030610                | 0.87652022                |
| H                                                       | 1             | 0.70745343                | -1.03037989               | 0.87660414                |
| H                                                       | 1             | 0.70742667                | -1.03051639               | -0.87622339               |
| C                                                       | 6             | -0.01156624               | 5.11488962                | -0.00375815               |
| O                                                       | 8             | -0.00549363               | 6.34571934                | 0.01703516                |
| C                                                       | 6             | -1.30142164               | 4.32762432                | -0.0343055                |
| C                                                       | 6             | 1.27066004                | 4.31450939                | -0.00043462               |
| H                                                       | 1             | 2.12014818                | 4.98226118                | 0.2161532                 |
| H                                                       | 1             | 1.21336973                | 3.49626422                | 0.74794924                |
| H                                                       | 1             | 1.40555763                | 3.84488726                | -0.99891937               |
| H                                                       | 1             | -2.14444351               | 5.01087666                | -0.22583377               |
| H                                                       | 1             | -1.43995047               | 3.82343268                | 0.94644451                |
| H                                                       | 1             | -1.2524308                | 3.53646231                | -0.81171566               |
| <b>Acetone-hexane dimer in linear (2) configuration</b> |               |                           |                           |                           |
| Atomic type                                             | Atomic number | Coordinates x (Angstroms) | Coordinates y (Angstroms) | Coordinates z (Angstroms) |
| C                                                       | 6             | -3.19168711               | 0.22053400                | -0.00007900               |

|   |   |             |             |             |
|---|---|-------------|-------------|-------------|
| C | 6 | 3.191679    | -0.22064000 | -0.00010900 |
| C | 6 | -0.66249651 | 0.37542349  | 0.00008400  |
| C | 6 | 0.66248655  | -0.37553293 | 0.00013870  |
| C | 6 | 1.87529767  | 0.54650563  | 0.00002184  |
| C | 6 | -1.87530732 | -0.54661465 | -0.00003970 |
| H | 1 | 4.0495882   | 0.45090935  | -0.00031807 |
| H | 1 | -4.04959822 | -0.45101309 | -0.00015142 |
| H | 1 | -3.26719499 | 0.85966712  | -0.88042289 |
| H | 1 | -3.26732731 | 0.85955530  | 0.88033670  |
| H | 1 | 3.26739216  | -0.85962069 | 0.88033277  |
| H | 1 | 3.26711679  | -0.85981274 | -0.88042748 |
| H | 1 | -1.82842422 | -1.19997871 | 0.87536758  |
| H | 1 | -1.82830048 | -1.19987381 | -0.87551820 |
| H | 1 | 1.82844031  | 1.19982517  | 0.87546831  |
| H | 1 | 1.8282634   | 1.19980919  | -0.87541753 |
| H | 1 | -0.70737624 | 1.03037131  | -0.87630719 |
| H | 1 | -0.7075243  | 1.03030610  | 0.87652022  |
| H | 1 | 0.70745343  | -1.03037989 | 0.87660414  |
| H | 1 | 0.70742667  | -1.03051639 | -0.87622339 |
| C | 6 | -0.01156624 | -4.88511038 | -0.00375815 |
| O | 8 | -0.00549363 | -3.6542809  | 0.01703516  |
| C | 6 | -1.30142164 | -5.67237568 | -0.0343055  |
| C | 6 | 1.27066004  | -5.68549109 | -0.00043462 |
| H | 1 | 2.12014818  | -5.01773882 | 0.2161532   |
| H | 1 | 1.21336973  | -6.50373554 | 0.74794924  |
| H | 1 | 1.40555763  | -6.15511274 | -0.99891937 |
| H | 1 | -2.14444351 | -4.98912334 | -0.22583377 |
| H | 1 | -1.43995047 | -6.17656708 | 0.94644451  |
| H | 1 | -1.2524308  | -6.46353769 | -0.81171566 |

**TABLE S9.** Cartesian coordinates at equilibrium points for acetone-silanol in four different configurations.

| Acetone-silanol dimer in <i>trans</i> -sandwich configuration |               |                           |                           |                           |
|---------------------------------------------------------------|---------------|---------------------------|---------------------------|---------------------------|
| Atomic type                                                   | Atomic number | Coordinates x (Angstroms) | Coordinates y (Angstroms) | Coordinates z (Angstroms) |
| C                                                             | 6             | -0.01156624               | 0.11488955                | -0.00375815               |
| O                                                             | 8             | -0.00549363               | 1.34571910                | 0.01703516                |

|    |    |             |             |             |
|----|----|-------------|-------------|-------------|
| C  | 6  | -1.30142164 | -0.67237544 | -0.03430550 |
| C  | 6  | 1.27066004  | -0.68549097 | -0.00043462 |
| H  | 1  | 2.12014818  | -0.01773864 | 0.21615320  |
| H  | 1  | 1.21336973  | -1.50373590 | 0.74794924  |
| H  | 1  | 1.40555763  | -1.15511274 | -0.99891937 |
| H  | 1  | -2.14444351 | 0.01087671  | -0.22583377 |
| H  | 1  | -1.43995047 | -1.17656708 | 0.94644451  |
| H  | 1  | -1.2524308  | -1.46353769 | -0.81171566 |
| Si | 14 | -0.0007245  | 0.58330631  | 3.44345689  |
| O  | 8  | 0.00515579  | -1.07275796 | 3.41608238  |
| H  | 1  | 0.11931599  | 1.10639966  | 4.82228041  |
| H  | 1  | -1.23983383 | 1.13347125  | 2.85089684  |
| H  | 1  | 1.16534019  | 0.99534422  | 2.64576864  |
| H  | 1  | -0.68734968 | -1.53657365 | 3.88804436  |

#### Acetone-silanol dimer in linear configuration

| Atomic type | Atomic number | Coordinates x (Angstroms) | Coordinates y (Angstroms) | Coordinates z (Angstroms) |
|-------------|---------------|---------------------------|---------------------------|---------------------------|
| C           | 6             | -0.01156624               | 0.11488955                | -0.00375815               |
| O           | 8             | -0.00549363               | 1.34571910                | 0.01703516                |
| C           | 6             | -1.30142164               | -0.67237544               | -0.03430550               |
| C           | 6             | 1.27066004                | -0.68549097               | -0.00043462               |
| H           | 1             | 2.12014818                | -0.01773864               | 0.21615320                |
| H           | 1             | 1.21336973                | -1.50373590               | 0.74794924                |
| H           | 1             | 1.40555763                | -1.15511274               | -0.99891937               |
| H           | 1             | -2.14444351               | 0.01087671                | -0.22583377               |
| H           | 1             | -1.43995047               | -1.17656708               | 0.94644451                |
| H           | 1             | -1.2524308                | -1.46353769               | -0.81171566               |
| Si          | 14            | -0.00623668               | 4.33654594                | -0.00588236               |
| O           | 8             | -0.02095969               | 5.99262428                | 0.01690894                |
| H           | 1             | -0.49189013               | 3.76919603                | 1.27139831                |
| H           | 1             | 1.35281229                | 3.80729222                | -0.25503370               |
| H           | 1             | -0.90692621               | 3.94893289                | -1.10328948               |
| H           | 1             | 0.51224071                | 6.44187832                | 0.67364764                |

#### Acetone-silanol dimer in T-shaped configuration

| Atomic type | Atomic number | Coordinates x (Angstroms) | Coordinates y (Angstroms) | Coordinates z (Angstroms) |
|-------------|---------------|---------------------------|---------------------------|---------------------------|
| C           | 6             | -0.01156624               | 0.11488955                | -0.00375815               |
| O           | 8             | -0.00549363               | 1.34571910                | 0.01703516                |

| C                                                                | 6             | -1.30142164               | -0.67237544               | -0.03430550               |
|------------------------------------------------------------------|---------------|---------------------------|---------------------------|---------------------------|
| C                                                                | 6             | 1.27066004                | -0.68549097               | -0.00043462               |
| H                                                                | 1             | 2.12014818                | -0.01773864               | 0.21615320                |
| H                                                                | 1             | 1.21336973                | -1.50373590               | 0.74794924                |
| H                                                                | 1             | 1.40555763                | -1.15511274               | -0.99891937               |
| H                                                                | 1             | -2.14444351               | 0.01087671                | -0.22583377               |
| H                                                                | 1             | -1.43995047               | -1.17656708               | 0.94644451                |
| H                                                                | 1             | -1.2524308                | -1.46353769               | -0.81171566               |
| Si                                                               | 14            | 0.01112336                | -0.01293467               | 3.86717105                |
| O                                                                | 8             | 0.04693098                | -0.02577630               | 5.52303505                |
| H                                                                | 1             | -0.22861519               | 1.34759450                | 3.33738208                |
| H                                                                | 1             | -1.04553747               | -0.90340751               | 3.33827972                |
| H                                                                | 1             | 1.33506835                | -0.49307203               | 3.44005823                |
| H                                                                | 1             | -0.73581982               | 0.25926429                | 5.99578285                |
| <b>Acetone-silanol dimer in parallel-displaced configuration</b> |               |                           |                           |                           |
| Atomic type                                                      | Atomic number | Coordinates x (Angstroms) | Coordinates y (Angstroms) | Coordinates z (Angstroms) |
| C                                                                | 6             | -0.01156624               | 0.11488955                | -0.00375815               |
| O                                                                | 8             | -0.00549363               | 1.34571910                | 0.01703516                |
| C                                                                | 6             | -1.30142164               | -0.67237544               | -0.03430550               |
| C                                                                | 6             | 1.27066004                | -0.68549097               | -0.00043462               |
| H                                                                | 1             | 2.12014818                | -0.01773864               | 0.21615320                |
| H                                                                | 1             | 1.21336973                | -1.50373590               | 0.74794924                |
| H                                                                | 1             | 1.40555763                | -1.15511274               | -0.99891937               |
| H                                                                | 1             | -2.14444351               | 0.01087671                | -0.22583377               |
| H                                                                | 1             | -1.43995047               | -1.17656708               | 0.94644451                |
| H                                                                | 1             | -1.2524308                | -1.46353769               | -0.81171566               |
| Si                                                               | 14            | -0.0007245                | 1.38330638                | 3.44345689                |
| O                                                                | 8             | 0.00515579                | -0.27275798               | 3.41608238                |
| H                                                                | 1             | 0.11931599                | 1.90639973                | 4.82228041                |
| H                                                                | 1             | -1.23983383               | 1.93347120                | 2.85089684                |
| H                                                                | 1             | 1.16534019                | 1.79534411                | 2.64576864                |
| H                                                                | 1             | -0.68734968               | -0.73657376               | 3.88804436                |

**TABLE S10.** Cartesian coordinates at equilibrium points for acetone-propylamine in three different configurations.

**Acetone-propylamine dimer in *trans*-sandwich configuration**

| Atomic type | Atomic number | Coordinates x (Angstroms) | Coordinates y (Angstroms) | Coordinates z (Angstroms) |
|-------------|---------------|---------------------------|---------------------------|---------------------------|
| C           | 6             | -0.01156624               | 0.11488955                | -0.00375815               |
| O           | 8             | -0.00549363               | 1.34571910                | 0.01703516                |
| C           | 6             | -1.30142164               | -0.67237544               | -0.03430550               |
| C           | 6             | 1.27066004                | -0.68549097               | -0.00043462               |
| H           | 1             | 2.12014818                | -0.01773864               | 0.21615320                |
| H           | 1             | 1.21336973                | -1.50373590               | 0.74794924                |
| H           | 1             | 1.40555763                | -1.15511274               | -0.99891937               |
| H           | 1             | -2.14444351               | 0.01087671                | -0.22583377               |
| H           | 1             | -1.43995047               | -1.17656708               | 0.94644451                |
| H           | 1             | -1.2524308                | -1.46353769               | -0.81171566               |
| C           | 6             | -0.13993451               | 1.95265615                | 3.79711461                |
| C           | 6             | 0.52693677                | 0.58340853                | 3.74940395                |
| C           | 6             | -0.48673043               | -0.55169493               | 3.85597086                |
| N           | 7             | 0.06303596                | -1.90412688               | 3.81899261                |
| H           | 1             | -0.68678081               | 2.08591866                | 4.73103571                |
| H           | 1             | -0.85032099               | 2.06736565                | 2.97784781                |
| H           | 1             | 0.58918822                | 2.75793338                | 3.72059393                |
| H           | 1             | -1.21291554               | -0.46444827               | 3.04448867                |
| H           | 1             | -1.05052102               | -0.44601154               | 4.78571606                |
| H           | 1             | 1.08786893                | 0.47152942                | 2.81754684                |
| H           | 1             | 1.25072706                | 0.48999804                | 4.56360483                |
| H           | 1             | 0.72788608                | -2.03167534               | 4.57347107                |
| H           | 1             | 0.57713336                | -2.04880023               | 2.95742464                |

**Acetone-propylamine dimer in linear configuration**

| Atomic type | Atomic number | Coordinates x (Angstroms) | Coordinates y (Angstroms) | Coordinates z (Angstroms) |
|-------------|---------------|---------------------------|---------------------------|---------------------------|
| C           | 6             | -0.01156624               | 0.11488955                | -0.00375815               |
| O           | 8             | -0.00549363               | 1.34571910                | 0.01703516                |
| C           | 6             | -1.30142164               | -0.67237544               | -0.03430550               |
| C           | 6             | 1.27066004                | -0.68549097               | -0.00043462               |
| H           | 1             | 2.12014818                | -0.01773864               | 0.21615320                |
| H           | 1             | 1.21336973                | -1.50373590               | 0.74794924                |
| H           | 1             | 1.40555763                | -1.15511274               | -0.99891937               |
| H           | 1             | -2.14444351               | 0.01087671                | -0.22583377               |
| H           | 1             | -1.43995047               | -1.17656708               | 0.94644451                |

|   |   |             |             |             |
|---|---|-------------|-------------|-------------|
| H | 1 | -1.2524308  | -1.46353769 | -0.81171566 |
| C | 6 | -0.15868212 | -8.02650928 | -0.01686032 |
| C | 6 | -0.6160472  | -6.57338905 | 0.01620147  |
| C | 6 | 0.55905175  | -5.60159636 | -0.02960473 |
| N | 7 | 0.21536528  | -4.18251133 | -0.00205227 |
| H | 1 | 0.48685071  | -8.24986267 | 0.83308625  |
| H | 1 | 0.40619123  | -8.23523712 | -0.92590147 |
| H | 1 | -1.00224948 | -8.71444416 | 0.01611658  |
| H | 1 | 1.14453399  | -5.78558540 | -0.93338513 |
| H | 1 | 1.22467101  | -5.80012655 | 0.81359822  |
| H | 1 | -1.27824557 | -6.36912918 | -0.82954717 |
| H | 1 | -1.19789612 | -6.38368893 | 0.92228425  |
| H | 1 | -0.3120212  | -3.96705031 | 0.83638179  |
| H | 1 | -0.3863624  | -3.95354652 | -0.78501117 |

**Acetone-propylamine dimer in parallel-displaced configuration**

| Atomic type | Atomic number | Coordinates x (Angstroms) | Coordinates y (Angstroms) | Coordinates z (Angstroms) |
|-------------|---------------|---------------------------|---------------------------|---------------------------|
| C           | 6             | -0.01156624               | 0.11488955                | -0.00375815               |
| O           | 8             | -0.00549363               | 1.34571910                | 0.01703516                |
| C           | 6             | -1.30142164               | -0.67237544               | -0.03430550               |
| C           | 6             | 1.27066004                | -0.68549097               | -0.00043462               |
| H           | 1             | 2.12014818                | -0.01773864               | 0.21615320                |
| H           | 1             | 1.21336973                | -1.50373590               | 0.74794924                |
| H           | 1             | 1.40555763                | -1.15511274               | -0.99891937               |
| H           | 1             | -2.14444351               | 0.01087671                | -0.22583377               |
| H           | 1             | -1.43995047               | -1.17656708               | 0.94644451                |
| H           | 1             | -1.2524308                | -1.46353769               | -0.81171566               |
| C           | 6             | -0.13993451               | 3.55265617                | 3.79711461                |
| C           | 6             | 0.52693677                | 2.18340850                | 3.74940395                |
| C           | 6             | -0.48673043               | 1.04830503                | 3.85597086                |
| N           | 7             | 0.06303596                | -0.30412686               | 3.81899261                |
| H           | 1             | -0.68678081               | 3.68591881                | 4.73103571                |
| H           | 1             | -0.85032099               | 3.66736579                | 2.97784781                |
| H           | 1             | 0.58918822                | 4.35793352                | 3.72059393                |
| H           | 1             | -1.21291554               | 1.13555169                | 3.04448867                |
| H           | 1             | -1.05052102               | 1.15398848                | 4.78571606                |
| H           | 1             | 1.08786893                | 2.07152939                | 2.81754684                |
| H           | 1             | 1.25072706                | 2.08999801                | 4.56360483                |
| H           | 1             | 0.72788608                | -0.43167537               | 4.57347107                |

|   |   |            |             |            |
|---|---|------------|-------------|------------|
| H | 1 | 0.57713336 | -0.44880018 | 2.95742464 |
|---|---|------------|-------------|------------|

**TABLE S11.** Cartesian coordinates at equilibrium points for hexane-propylamine in linear configuration.

| <b>Hexane-propylamine dimer in linear configuration</b> |               |                           |                           |                           |
|---------------------------------------------------------|---------------|---------------------------|---------------------------|---------------------------|
| Atomic type                                             | Atomic number | Coordinates x (Angstroms) | Coordinates y (Angstroms) | Coordinates z (Angstroms) |
| C                                                       | 6             | -3.19168711               | 0.22053400                | -0.00007900               |
| C                                                       | 6             | 3.191679                  | -0.22064000               | -0.00010900               |
| C                                                       | 6             | -0.66249651               | 0.37542349                | 0.00008400                |
| C                                                       | 6             | 0.66248655                | -0.37553293               | 0.00013870                |
| C                                                       | 6             | 1.87529767                | 0.54650563                | 0.00002184                |
| C                                                       | 6             | -1.87530732               | -0.54661465               | -0.00003970               |
| H                                                       | 1             | 4.0495882                 | 0.45090935                | -0.00031807               |
| H                                                       | 1             | -4.04959822               | -0.45101309               | -0.00015142               |
| H                                                       | 1             | -3.26719499               | 0.85966712                | -0.88042289               |
| H                                                       | 1             | -3.26732731               | 0.85955530                | 0.88033670                |
| H                                                       | 1             | 3.26739216                | -0.85962069               | 0.88033277                |
| H                                                       | 1             | 3.26711679                | -0.85981274               | -0.88042748               |
| H                                                       | 1             | -1.82842422               | -1.19997871               | 0.87536758                |
| H                                                       | 1             | -1.82830048               | -1.19987381               | -0.87551820               |
| H                                                       | 1             | 1.82844031                | 1.19982517                | 0.87546831                |
| H                                                       | 1             | 1.8282634                 | 1.19980919                | -0.87541753               |
| H                                                       | 1             | -0.70737624               | 1.03037131                | -0.87630719               |
| H                                                       | 1             | -0.7075243                | 1.03030610                | 0.87652022                |
| H                                                       | 1             | 0.70745343                | -1.03037989               | 0.87660414                |
| H                                                       | 1             | 0.70742667                | -1.03051639               | -0.87622339               |
| C                                                       | 6             | -1.9124428                | 0.3474696                 | 3.72744846                |
| C                                                       | 6             | -0.62413043               | -0.46420807               | 3.78457189                |
| C                                                       | 6             | 0.61526549                | 0.4212864                 | 3.70010304                |
| N                                                       | 7             | 1.89967227                | -0.27207324               | 3.74737239                |
| H                                                       | 1             | -1.97427726               | 0.91283792                | 2.79710245                |
| H                                                       | 1             | -1.95958531               | 1.05966175                | 4.5518055                 |
| H                                                       | 1             | -2.79280186               | -0.2906715                | 3.78820109                |
| H                                                       | 1             | 0.59722817                | 1.14626861                | 4.51713181                |
| H                                                       | 1             | 0.58262944                | 1.00047743                | 2.77439928                |
| H                                                       | 1             | -0.58505189               | -1.04124546               | 4.71248388                |



|   |   |             |             |            |
|---|---|-------------|-------------|------------|
| H | 1 | -0.59967339 | -1.18745637 | 2.96491694 |
| H | 1 | 1.96371436  | -0.94089758 | 2.98835754 |
| H | 1 | 1.9772805   | -0.805556   | 4.60580063 |

**TABLE S12.** Cartesian coordinates at equilibrium points for hexane-silanol dimer in two different configurations.

| <b>Hexane-silanol dimer in sandwich configuration</b> |               |                           |                           |                           |
|-------------------------------------------------------|---------------|---------------------------|---------------------------|---------------------------|
| Atomic type                                           | Atomic number | Coordinates x (Angstroms) | Coordinates y (Angstroms) | Coordinates z (Angstroms) |
| C                                                     | 6             | -3.19168711               | 0.22053400                | -0.00007900               |
| C                                                     | 6             | 3.191679                  | -0.22064000               | -0.00010900               |
| C                                                     | 6             | -0.66249651               | 0.37542349                | 0.00008400                |
| C                                                     | 6             | 0.66248655                | -0.37553293               | 0.00013870                |
| C                                                     | 6             | 1.87529767                | 0.54650563                | 0.00002184                |
| C                                                     | 6             | -1.87530732               | -0.54661465               | -0.00003970               |
| H                                                     | 1             | 4.0495882                 | 0.45090935                | -0.00031807               |
| H                                                     | 1             | -4.04959822               | -0.45101309               | -0.00015142               |
| H                                                     | 1             | -3.26719499               | 0.85966712                | -0.88042289               |
| H                                                     | 1             | -3.26732731               | 0.85955530                | 0.88033670                |
| H                                                     | 1             | 3.26739216                | -0.85962069               | 0.88033277                |
| H                                                     | 1             | 3.26711679                | -0.85981274               | -0.88042748               |
| H                                                     | 1             | -1.82842422               | -1.19997871               | 0.87536758                |
| H                                                     | 1             | -1.82830048               | -1.19987381               | -0.87551820               |
| H                                                     | 1             | 1.82844031                | 1.19982517                | 0.87546831                |
| H                                                     | 1             | 1.8282634                 | 1.19980919                | -0.87541753               |
| H                                                     | 1             | -0.70737624               | 1.03037131                | -0.87630719               |
| H                                                     | 1             | -0.7075243                | 1.03030610                | 0.87652022                |
| H                                                     | 1             | 0.70745343                | -1.03037989               | 0.87660414                |
| H                                                     | 1             | 0.70742667                | -1.03051639               | -0.87622339               |
| Si                                                    | 14            | -0.57636207               | -0.01518897               | 3.95881033                |
| O                                                     | 8             | 1.0797199                 | -0.04123434               | 3.96566582                |
| H                                                     | 1             | -1.10038912               | 1.15124559                | 3.21448708                |
| H                                                     | 1             | -1.12605703               | 0.03265449                | 5.33167124                |
| H                                                     | 1             | -0.98793107               | -1.26218832               | 3.29443717                |
| H                                                     | 1             | 1.54325831                | 0.69789189                | 4.36096525                |

**Hexane-silanol dimer in T-shaped configuration**

| Atomic type | Atomic number | Coordinates x (Angstroms) | Coordinates y (Angstroms) | Coordinates z (Angstroms) |
|-------------|---------------|---------------------------|---------------------------|---------------------------|
| C           | 6             | -3.19168711               | 0.22053400                | -0.00007900               |
| C           | 6             | 3.191679                  | -0.22064000               | -0.00010900               |
| C           | 6             | -0.66249651               | 0.37542349                | 0.00008400                |
| C           | 6             | 0.66248655                | -0.37553293               | 0.00013870                |
| C           | 6             | 1.87529767                | 0.54650563                | 0.00002184                |
| C           | 6             | -1.87530732               | -0.54661465               | -0.00003970               |
| H           | 1             | 4.0495882                 | 0.45090935                | -0.00031807               |
| H           | 1             | -4.04959822               | -0.45101309               | -0.00015142               |
| H           | 1             | -3.26719499               | 0.85966712                | -0.88042289               |
| H           | 1             | -3.26732731               | 0.85955530                | 0.88033670                |
| H           | 1             | 3.26739216                | -0.85962069               | 0.88033277                |
| H           | 1             | 3.26711679                | -0.85981274               | -0.88042748               |
| H           | 1             | -1.82842422               | -1.19997871               | 0.87536758                |
| H           | 1             | -1.82830048               | -1.19987381               | -0.87551820               |
| H           | 1             | 1.82844031                | 1.19982517                | 0.87546831                |
| H           | 1             | 1.8282634                 | 1.19980919                | -0.87541753               |
| H           | 1             | -0.70737624               | 1.03037131                | -0.87630719               |
| H           | 1             | -0.7075243                | 1.03030610                | 0.87652022                |
| H           | 1             | 0.70745343                | -1.03037989               | 0.87660414                |
| H           | 1             | 0.70742667                | -1.03051639               | -0.87622339               |
| Si          | 14            | -0.013387                 | 0.04167768                | 3.7777946                 |
| O           | 8             | -0.00490459               | -0.01404535               | 5.43313599                |
| H           | 1             | -0.19010881               | 1.42359102                | 3.27952218                |
| H           | 1             | -1.09600782               | -0.79201818               | 3.21027017                |
| H           | 1             | 1.29710364                | -0.48052168               | 3.35861659                |
| H           | 1             | -0.78321582               | 0.29034868                | 5.90112448                |

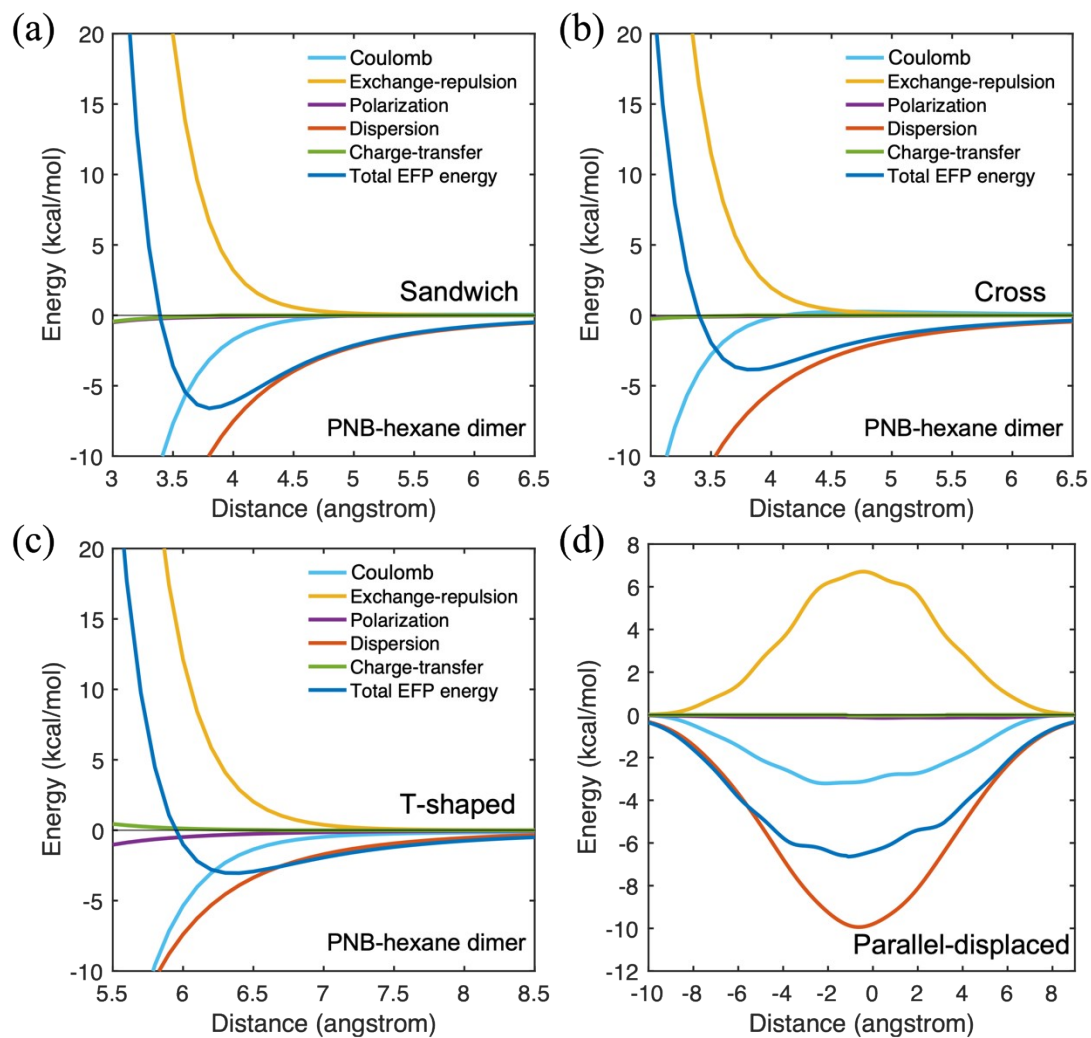

**FIGURE S1.** Potential energy surface for p-nitrobenzaldehyde (PNB)-hexane in four different configurations. (a) *trans*-Sandwich (b) Cross (c) T-shaped (d) Parallel-displaced

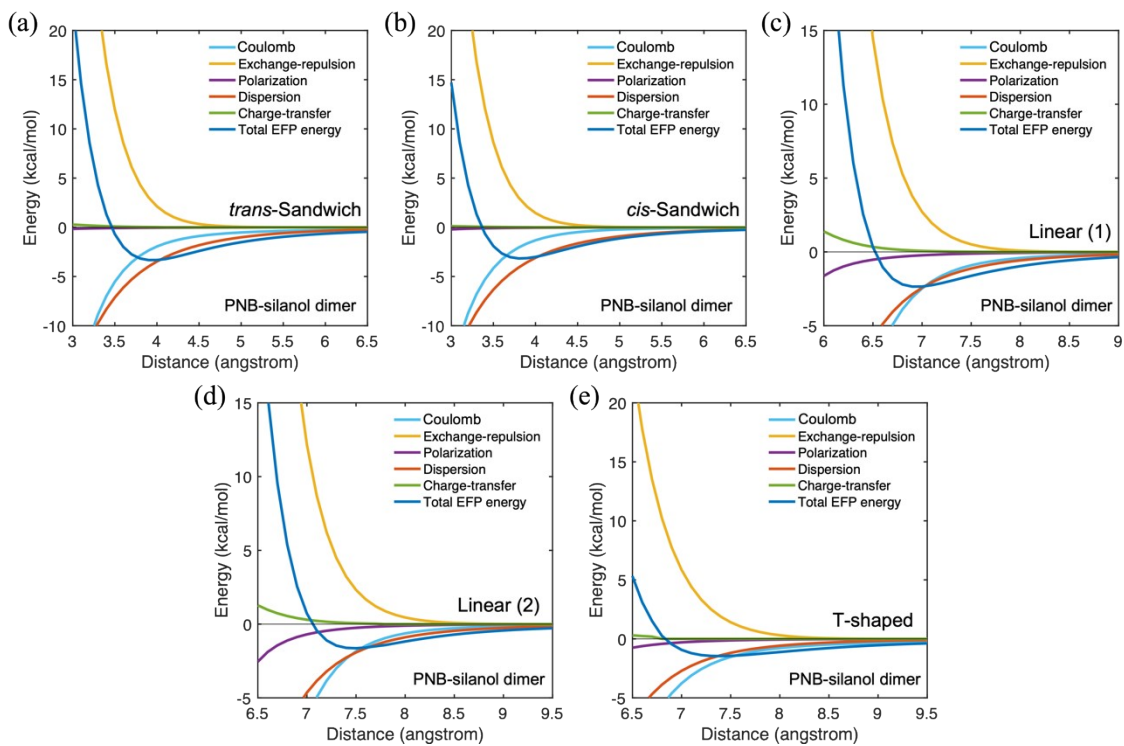

**FIGURE S2.** Potential energy surface for p-nitrobenzaldehyde (PNB)-silanol in five different configurations. (a) *trans*-Sandwich (b) *cis*-Sandwich (c) Linear (1) (d) Linear (2) (e) T-shaped

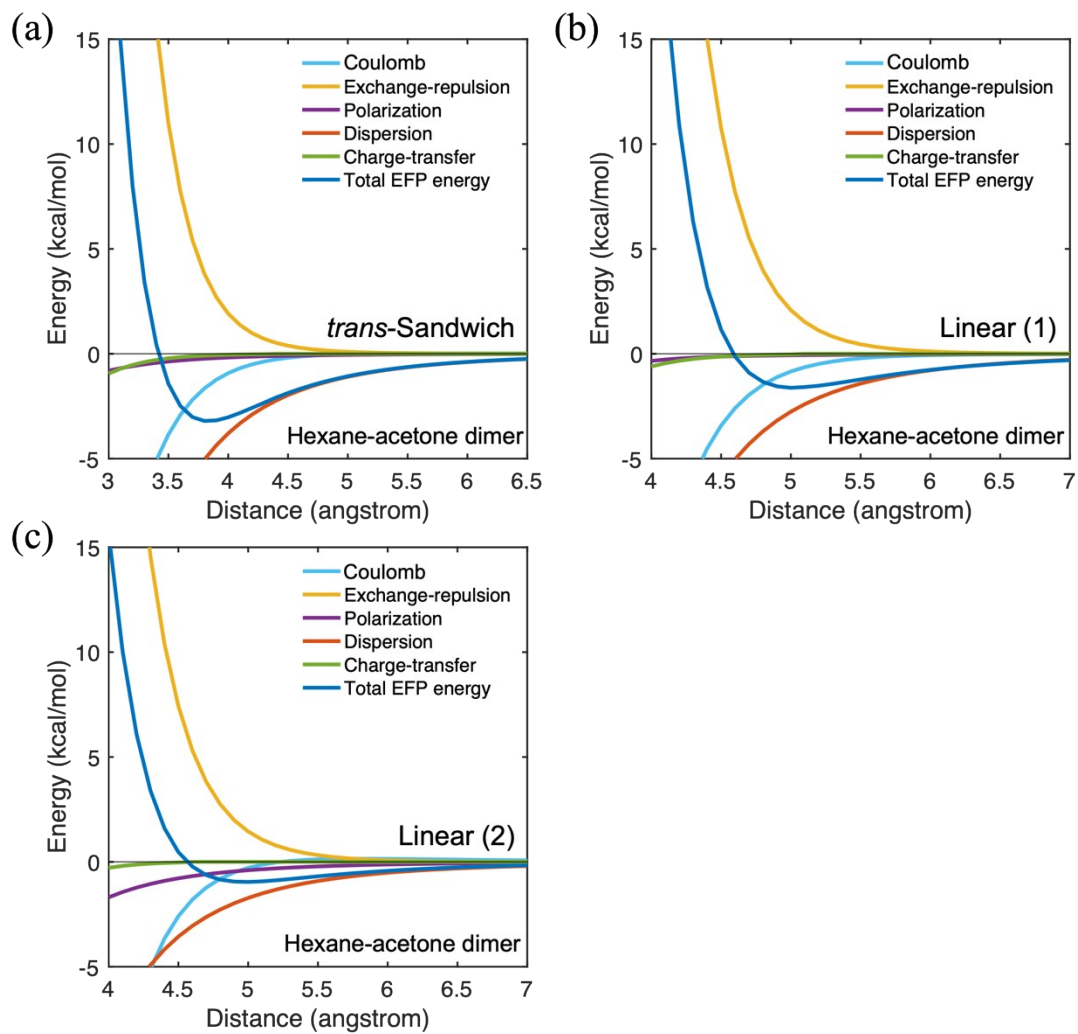

**FIGURE S3.** Potential energy surface for acetone-hexane in three different configurations. (a)

*trans*-Sandwich (b) Linear (1) (c) Linear (2)

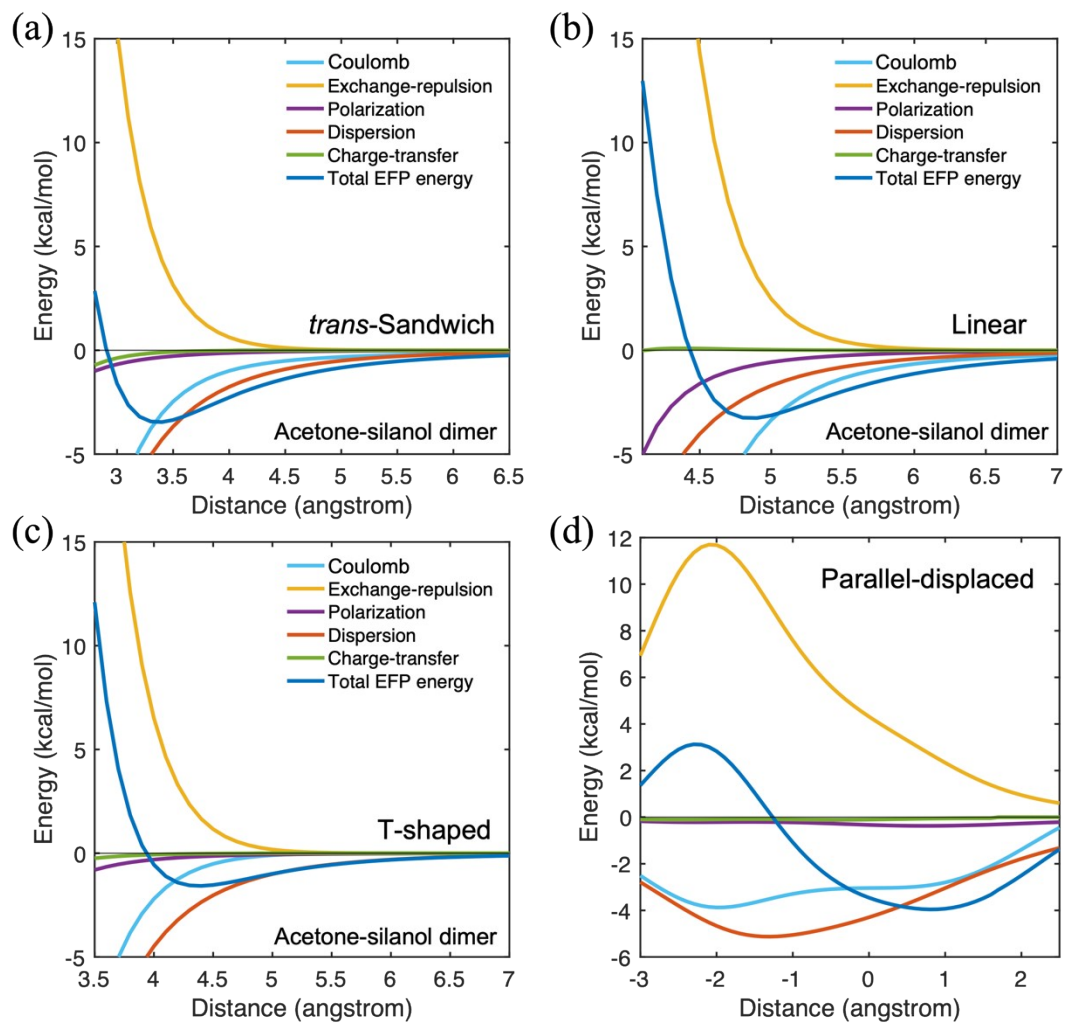

**FIGURE S4.** Potential energy surface for acetone-silanol in four different configurations. (a) *trans*-Sandwich (b) Linear (c) T-shaped (d) Parallel-displaced

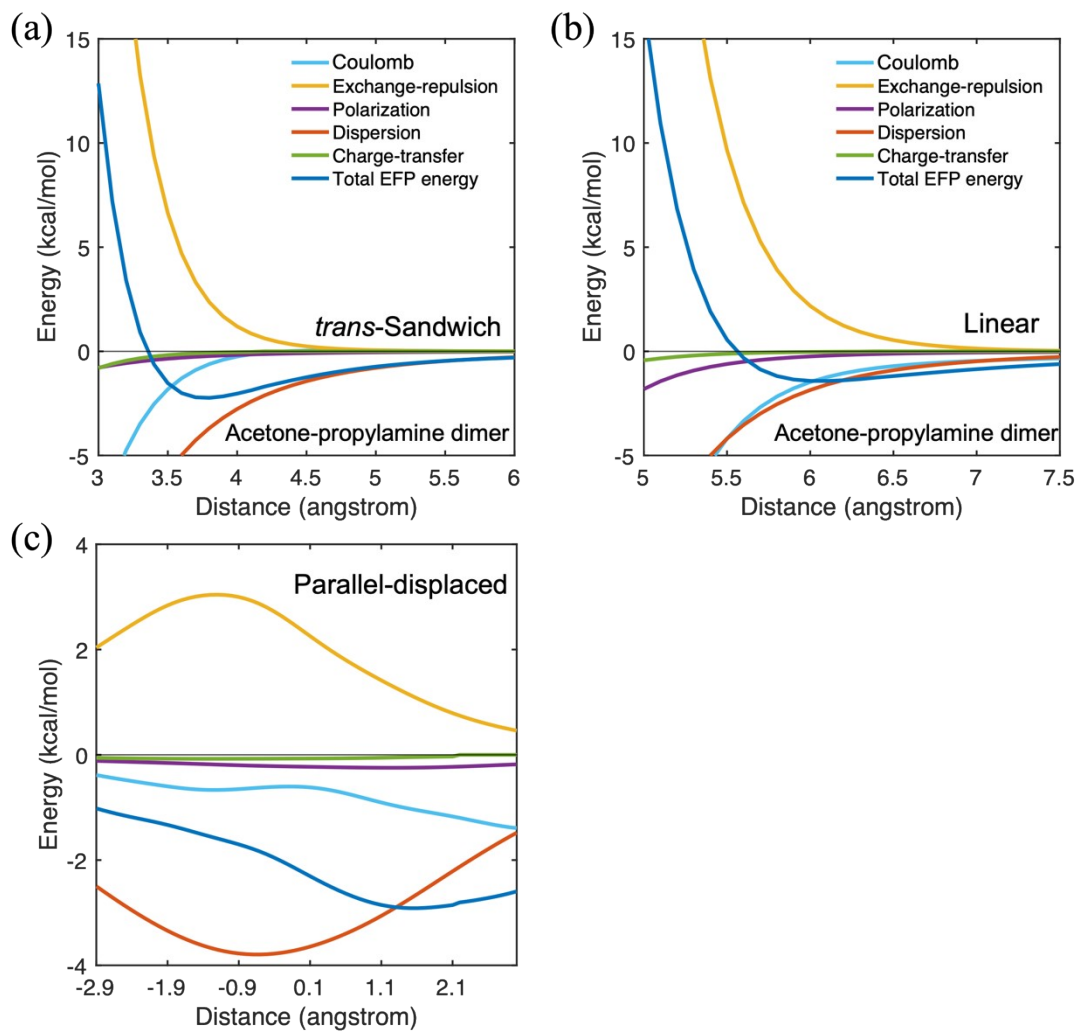

**FIGURE S5.** Potential energy surface for acetone-propylamine in three different configurations.

(a) *trans*-Sandwich (b) Linear (c) Parallel-displaced

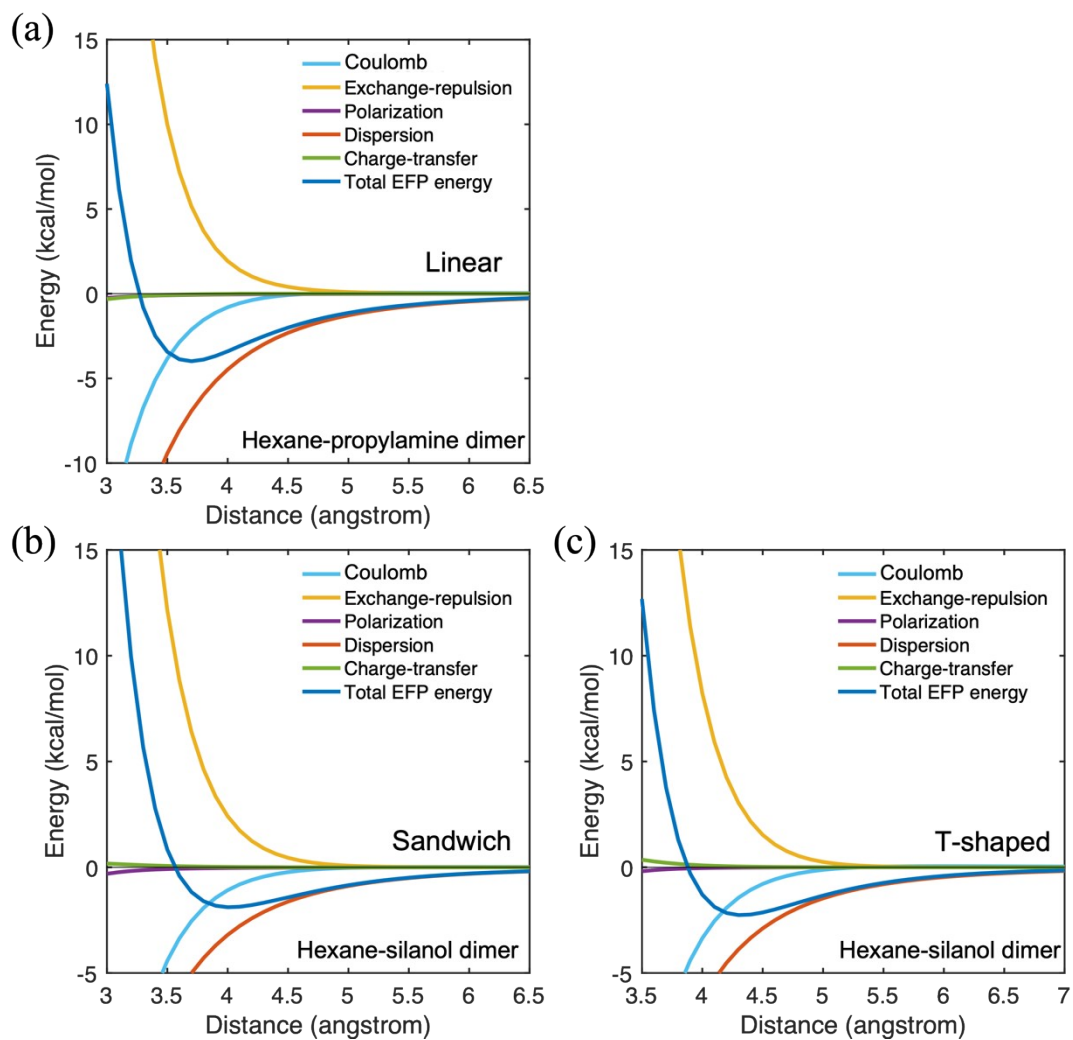

**FIGURE S6.** Potential energy surface (a) linear configuration for hexane-propylamine dimer (b) sandwich configuration for hexane-silanol dimer (c) T-shaped configuration for hexane-silanol dimer
